# Supplementary material for: Predictions of attainable compositions of layered quaternary i-MAB phases and solid solution MAB phases
Source: Royal Society of Chemistry journal article supplement (doi:10.1039/d1nr02552j), 2021-01-01
Supplement: d1nr02552j1.pdf [file d1nr02552j1.pdf]

## Supplementary Information for

# Predictions of Attainable Compositions of Layered Quaternary *i*-MAB Phases and solid solution MAB phases

Martin Dahlvist\*, Johanna Rosen\*

*Thin Film Physics, Department of Physics, Chemistry and Biology (IFM), Linköping University,  
SE-581 83 Linköping, Sweden*

\* corresponding author: martin.dahlvist@liu.se; johanna.rosen@liu.se

This PDF file contains:

Schematic illustration of considered magnetic configurations for quaternary chemically ordered *i*-MAB phases (Figure S1) and quaternary solid solution MAB phases (Figure S2).

Convergence test for plane-wave energy cut-off and k-point density (Figure S3).

Experimentally known ternary MAB phases (Table S1), quaternary solid solution MAB phases (Table S2) and quaternary chemically ordered *i*-MAB phases (Table S3).

Calculated thermodynamic stability of quaternary MAB phases evaluated at 0 K (Figure S4).

Theoretically predicted stable quaternary MAB phases at 2000 K (Table S4-S6).

Dynamical stability calculated for thermodynamically stable *i*-MAB phases (Figure S5-S43).

Atomic radius and electronegativity for considered *M* and *A* elements (Table S7).

Calculated density of states, crystal overlap Hamilton population integrated crystal overlap Hamilton population for selected *i*-MAB phases (Figure S44-S48).

Calculated electronic band-structures for selected *i*-MAB phases (Figure S49-S57).

Details for retrieving mechanical properties and corresponding results (Table S8 and Figure S58).

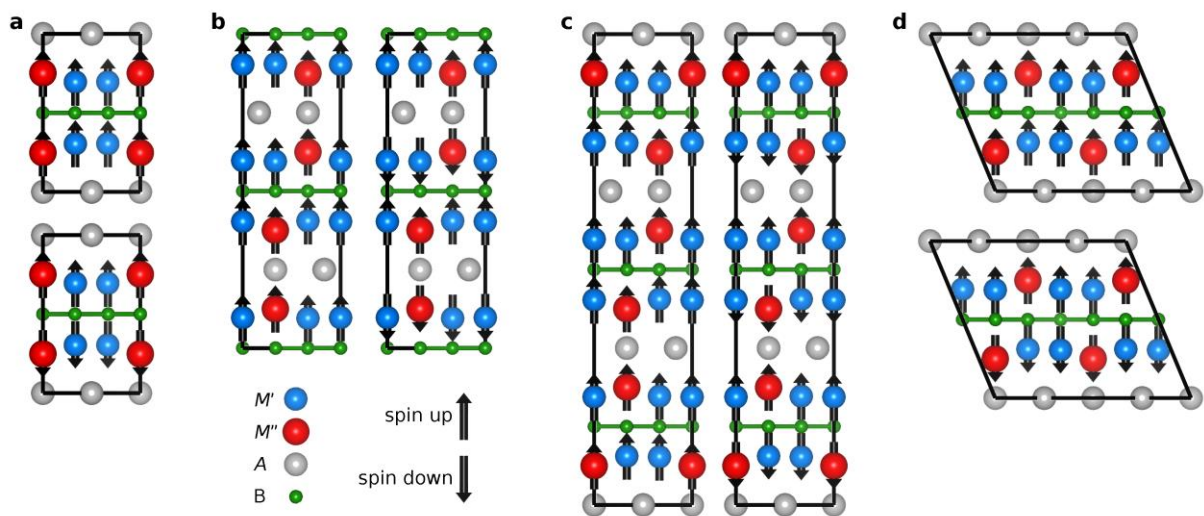

Figure S1. Schematic illustration of considered spin configurations for *i*-MAB phases with space group symmetry (a)  $P\bar{6}2m$ , (b)  $P\bar{6}2c$ , (c)  $R\bar{3}m$ , and (d)  $C2$ .

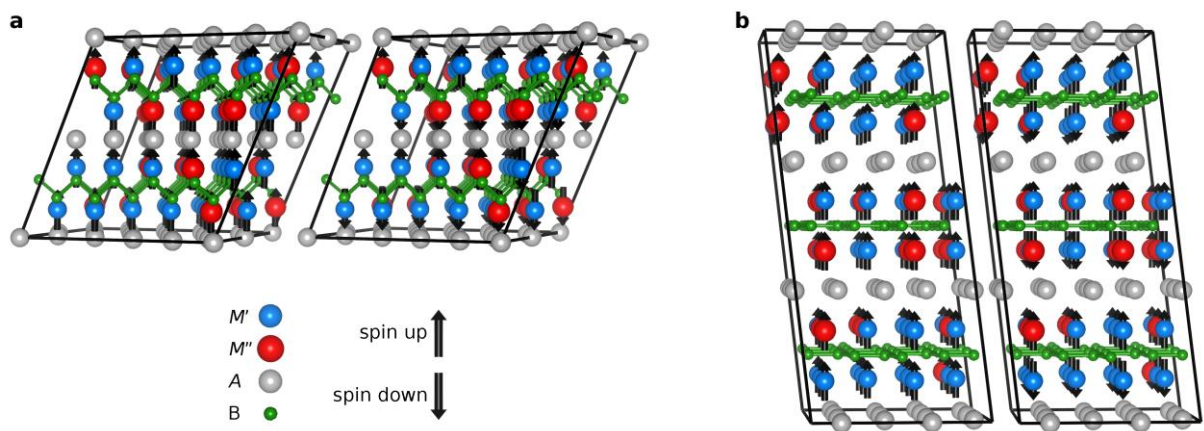

Figure S2. Schematic illustration of considered spin configurations for disordered solid solution MAB phases with space group symmetry (a)  $Cmmm$  and (b)  $P\bar{6}m2$ .

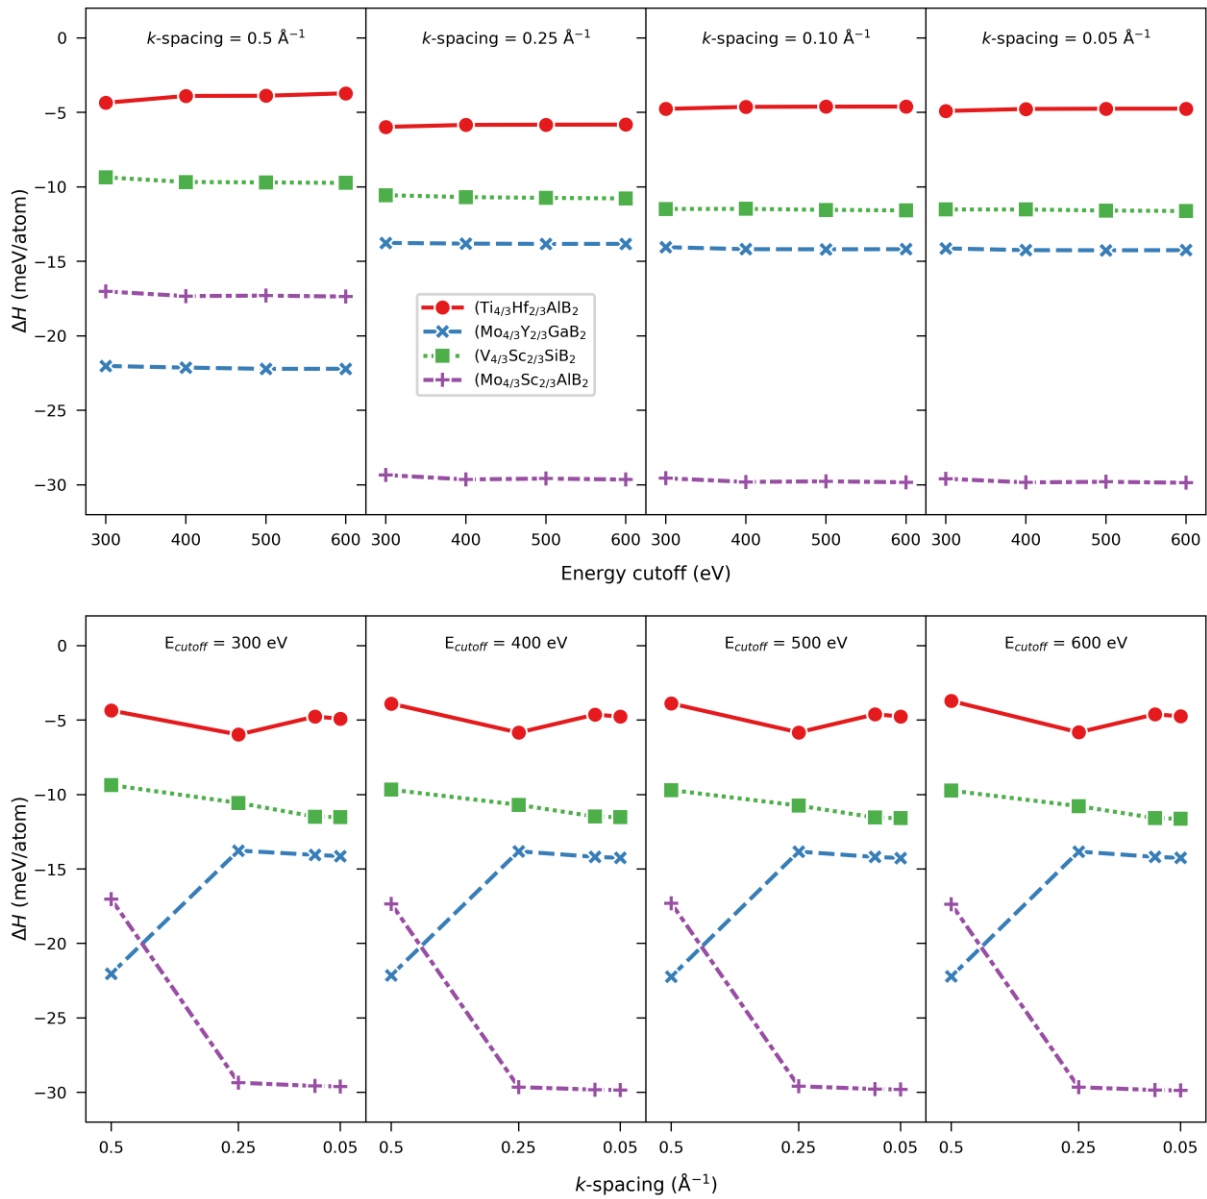

Figure S3. Demonstration for convergence of formation enthalpy  $\Delta H_{cp}$  for four different *i*-MAB phases with space group  $R\bar{3}m$ . Top panels show  $\Delta H_{cp}$  as function of plane wave energy cutoff using four different *k*-point densities for the *i*-MAB phase and its competing phases. Bottom panels show  $\Delta H_{cp}$  as function of *k*-point density for different plane wave energy cutoffs for the *i*-MAB phase and its competing phases. Using a plane wave energy cutoff of 400 eV combined with a *k*-point density of 0.05  $\text{\AA}^{-1}$  ensures  $\Delta H_{cp}$  values within less than 0.5 meV/atom as compared to using larger cutoff energies or denser *k*-point meshes.

Table S1. Experimentally reported ternary  $M_2AB_2$  phases.

| Phase       | Symmetry     | References |
|-------------|--------------|------------|
| $Cr_2AlB_2$ | $Cmmm$       | 1-3        |
| $Mn_2AlB_2$ | $Cmmm$       | 1-5        |
| $Fe_2AlB_2$ | $Cmmm$       | 2, 3, 6, 7 |
| $Ti_2InB_2$ | $P\bar{6}m2$ | 8          |

Table S2. Experimentally reported quaternary solid solution MAB phases with  $M$ -site chemical disorder.

| Phase                         | Symmetry | References |
|-------------------------------|----------|------------|
| $(Mn_{0.67}Fe_{0.33})_2AlB_2$ | $Cmmm$   | 3          |
| $(Fe_{0.67}Mn_{0.33})_2AlB_2$ | $Cmmm$   | 3          |
| $(Cr_{0.67}Mn_{0.33})_2AlB_2$ | $Cmmm$   | 9          |
| $(Mn_{0.67}Cr_{0.33})_2AlB_2$ | $Cmmm$   | 9          |

Table S3. Experimentally reported quaternary MAB phases with  $M$ -site chemical order ( $i$ -MAB)

| Phase                   | Symmetry    | References |
|-------------------------|-------------|------------|
| $MO_{4/3}Sc_{2/3}AlB_2$ | $R\bar{3}m$ | 10         |
| $MO_{4/3}Y_{2/3}AlB_2$  | $R\bar{3}m$ | 10         |



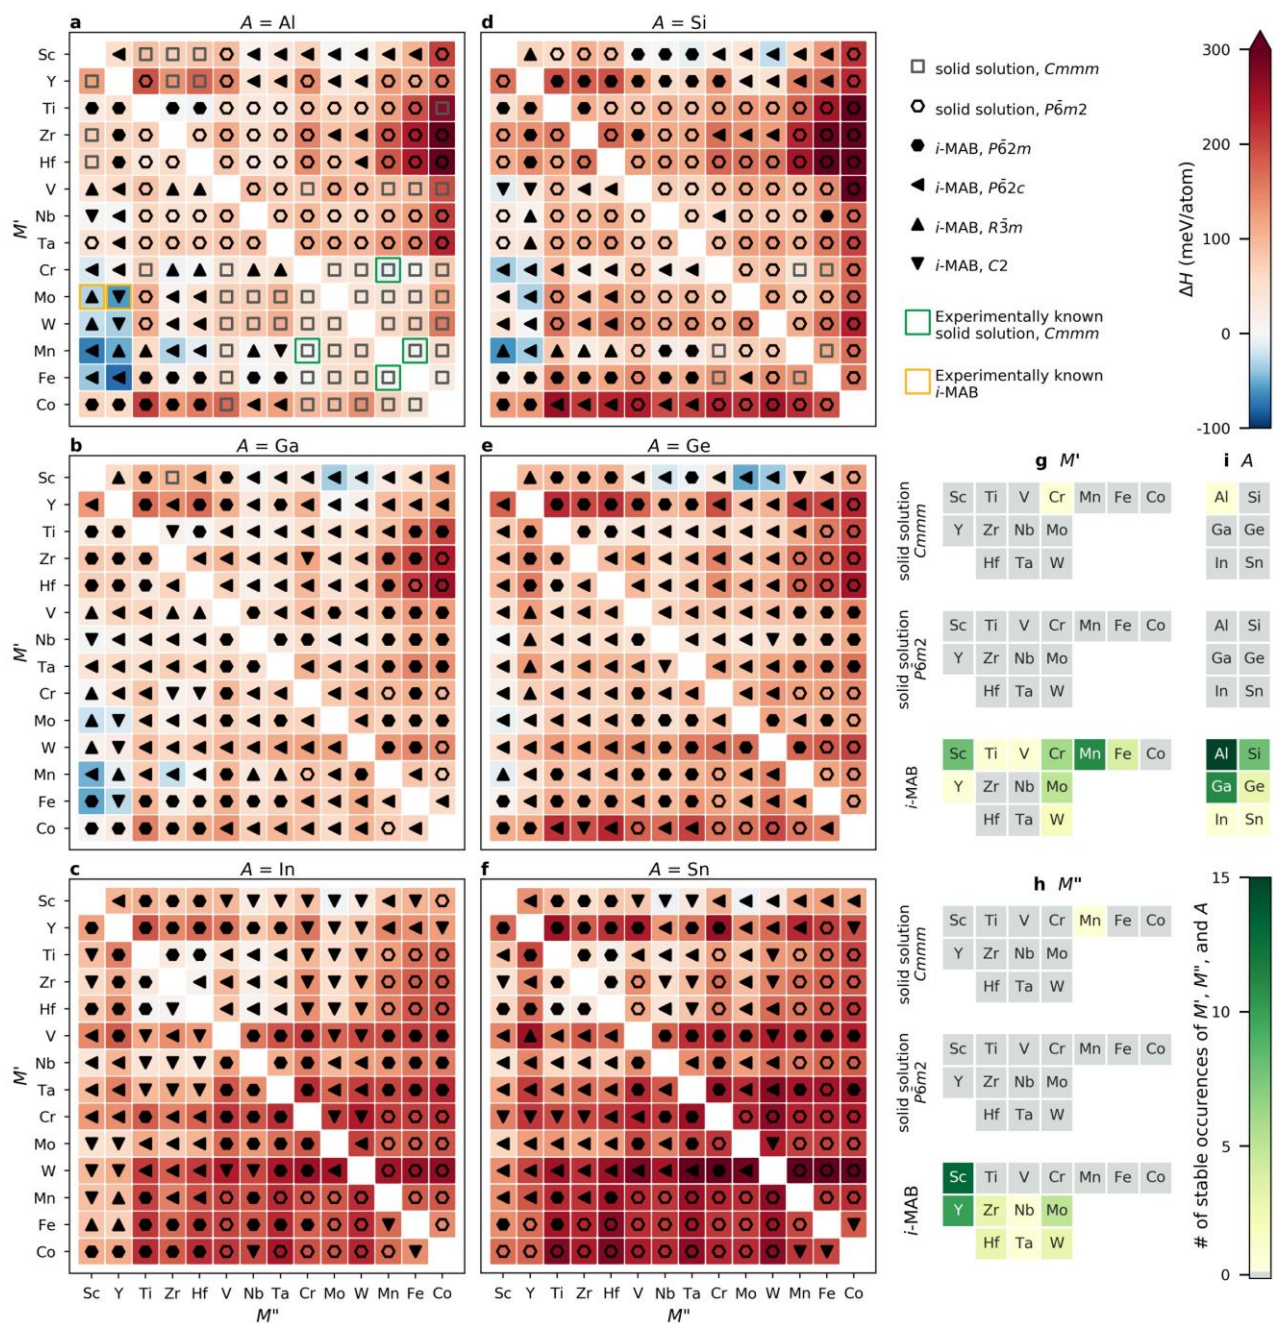

Figure S4. (a-f) Calculated formation enthalpy  $\Delta H$  (order) or and Gibbs free energy of formation (solid solution) at 0 K for A = Al, Ga, In, Si, Ge, and Sn. Number of atomic elements in stable  $i$ -MAB and solid solution MAB phases for (g)  $M'$ , (h)  $M''$ , and (i) A.

Table S4. Experimentally reported and theoretically predicted quaternary chemically ordered i-MAB phases, categorized by the calculated thermodynamic stability. The unit for  $\Delta H_{i\text{-MAB}}$  and  $\Delta G_{\text{solid solution}}$  is in meV/atom. Dynamically unstable i-MAB phases are marked with \*.

| Phase                          | Stability criteria                                           | Experimentally reported and here predicted                 | Predicted                                      |
|--------------------------------|--------------------------------------------------------------|------------------------------------------------------------|------------------------------------------------|
| <i>i</i> -MAB, chemical order  | $\Delta H_{o\text{-MAB}} < 0$                                | $\text{Mo}_{4/3}\text{Sc}_{2/3}\text{AlB}_2$ <sup>10</sup> | $\text{Ti}_{4/3}\text{Hf}_{2/3}\text{AlB}_2$   |
| $M'_{4/3}M''_{2/3}\text{AB}_2$ | $\Delta G_{\text{solid solution}} > \Delta H_{i\text{-MAB}}$ | $\text{Mo}_{4/3}\text{Y}_{2/3}\text{AlB}_2$ <sup>10</sup>  | $\text{Cr}_{4/3}\text{Sc}_{2/3}\text{AlB}_2$   |
|                                |                                                              |                                                            | $\text{Cr}_{4/3}\text{Zr}_{2/3}\text{AlB}_2$   |
|                                |                                                              |                                                            | $\text{Cr}_{4/3}\text{Hf}_{2/3}\text{AlB}_2$   |
|                                |                                                              |                                                            | $\text{W}_{4/3}\text{Sc}_{2/3}\text{AlB}_2$    |
|                                |                                                              |                                                            | $\text{W}_{4/3}\text{Y}_{2/3}\text{AlB}_2$     |
|                                |                                                              |                                                            | $\text{Mn}_{4/3}\text{Sc}_{2/3}\text{AlB}_2$   |
|                                |                                                              |                                                            | $\text{Mn}_{4/3}\text{Y}_{2/3}\text{AlB}_2$    |
|                                |                                                              |                                                            | $\text{Mn}_{4/3}\text{Zr}_{2/3}\text{AlB}_2$   |
|                                |                                                              |                                                            | $\text{Mn}_{4/3}\text{Hf}_{2/3}\text{AlB}_2$   |
|                                |                                                              |                                                            | $\text{Mn}_{4/3}\text{Nb}_{2/3}\text{AlB}_2$   |
|                                |                                                              |                                                            | $\text{Fe}_{4/3}\text{Sc}_{2/3}\text{AlB}_2$   |
|                                |                                                              |                                                            | $\text{Fe}_{4/3}\text{Y}_{2/3}\text{AlB}_2$    |
|                                |                                                              |                                                            | $\text{Sc}_{4/3}\text{Mo}_{2/3}\text{GaB}_2^*$ |
|                                |                                                              |                                                            | $\text{Sc}_{4/3}\text{W}_{2/3}\text{GaB}_2^*$  |
|                                |                                                              |                                                            | $\text{Y}_{4/3}\text{Mo}_{2/3}\text{GaB}_2$    |
|                                |                                                              |                                                            | $\text{Cr}_{4/3}\text{Sc}_{2/3}\text{GaB}_2$   |
|                                |                                                              |                                                            | $\text{Mo}_{4/3}\text{Sc}_{2/3}\text{GaB}_2$   |
|                                |                                                              |                                                            | $\text{Mo}_{4/3}\text{Y}_{2/3}\text{GaB}_2$    |
|                                |                                                              |                                                            | $\text{Mn}_{4/3}\text{Sc}_{2/3}\text{GaB}_2$   |
|                                |                                                              |                                                            | $\text{Mn}_{4/3}\text{Y}_{2/3}\text{GaB}_2$    |
|                                |                                                              |                                                            | $\text{Mn}_{4/3}\text{Zr}_{2/3}\text{GaB}_2$   |
|                                |                                                              |                                                            | $\text{Fe}_{4/3}\text{Sc}_{2/3}\text{GaB}_2$   |
|                                |                                                              |                                                            | $\text{Fe}_{4/3}\text{Y}_{2/3}\text{GaB}_2$    |
|                                |                                                              |                                                            | $\text{Sc}_{4/3}\text{Mo}_{2/3}\text{InB}_2$   |
|                                |                                                              |                                                            | $\text{Sc}_{4/3}\text{Ta}_{2/3}\text{SiB}_2$   |
|                                |                                                              |                                                            | $\text{Sc}_{4/3}\text{W}_{2/3}\text{SiB}_2^*$  |
|                                |                                                              |                                                            | $\text{V}_{4/3}\text{Sc}_{2/3}\text{SiB}_2$    |
|                                |                                                              |                                                            | $\text{Cr}_{4/3}\text{Sc}_{2/3}\text{SiB}_2$   |
|                                |                                                              |                                                            | $\text{Cr}_{4/3}\text{Y}_{2/3}\text{SiB}_2$    |
|                                |                                                              |                                                            | $\text{Mo}_{4/3}\text{Y}_{2/3}\text{SiB}_2$    |
|                                |                                                              |                                                            | $\text{Mn}_{4/3}\text{Sc}_{2/3}\text{SiB}_2$   |
|                                |                                                              |                                                            | $\text{Mn}_{4/3}\text{Y}_{2/3}\text{SiB}_2$    |
|                                |                                                              |                                                            | $\text{Sc}_{4/3}\text{Mo}_{2/3}\text{GeB}_2$   |
|                                |                                                              |                                                            | $\text{Sc}_{4/3}\text{W}_{2/3}\text{GeB}_2$    |
|                                |                                                              |                                                            | $\text{Mn}_{4/3}\text{Sc}_{2/3}\text{GeB}_2$   |
|                                |                                                              |                                                            | $\text{Sc}_{4/3}\text{Mo}_{2/3}\text{SnB}_2$   |

Table S5. Theoretically predicted quaternary disordered solid solution MAB phases with  $P\bar{6}m2$  symmetry. The unit for  $\Delta G_{\text{solid solution}}$  is in meV/atom.

| Phase                                                  | Stability criteria                                           | Experimentally reported and here predicted | Predicted                                                              |
|--------------------------------------------------------|--------------------------------------------------------------|--------------------------------------------|------------------------------------------------------------------------|
| $P\bar{6}m2$ , solid solution                          | $\Delta G_{\text{solid solution}} \leq 0$                    | N/A                                        | (Ti <sub>0.67</sub> Nb <sub>0.33</sub> ) <sub>2</sub> AlB <sub>2</sub> |
| ( $M'_{0.67}M''_{0.33}$ ) <sub>2</sub> AB <sub>2</sub> | $\Delta G_{\text{solid solution}} < \Delta H_{i\text{-MAB}}$ |                                            | (Ti <sub>0.67</sub> Ta <sub>0.33</sub> ) <sub>2</sub> AlB <sub>2</sub> |
|                                                        |                                                              |                                            | (Sc <sub>0.67</sub> Nb <sub>0.33</sub> ) <sub>2</sub> GaB <sub>2</sub> |
|                                                        |                                                              |                                            | (Ti <sub>0.67</sub> Hf <sub>0.33</sub> ) <sub>2</sub> GaB <sub>2</sub> |
|                                                        |                                                              |                                            | (Ti <sub>0.67</sub> Nb <sub>0.33</sub> ) <sub>2</sub> GaB <sub>2</sub> |
|                                                        |                                                              |                                            | (Ti <sub>0.67</sub> Ta <sub>0.33</sub> ) <sub>2</sub> GaB <sub>2</sub> |
|                                                        |                                                              |                                            | (Hf <sub>0.67</sub> Nb <sub>0.33</sub> ) <sub>2</sub> GaB <sub>2</sub> |
|                                                        |                                                              |                                            | (Nb <sub>0.67</sub> Sc <sub>0.33</sub> ) <sub>2</sub> GaB <sub>2</sub> |
|                                                        |                                                              |                                            | (Nb <sub>0.67</sub> Ti <sub>0.33</sub> ) <sub>2</sub> GaB <sub>2</sub> |
|                                                        |                                                              |                                            | (Nb <sub>0.67</sub> Hf <sub>0.33</sub> ) <sub>2</sub> GaB <sub>2</sub> |
|                                                        |                                                              |                                            | (Nb <sub>0.67</sub> Ta <sub>0.33</sub> ) <sub>2</sub> GaB <sub>2</sub> |
|                                                        |                                                              |                                            | (Nb <sub>0.67</sub> Mo <sub>0.33</sub> ) <sub>2</sub> GaB <sub>2</sub> |
|                                                        |                                                              |                                            | (Sc <sub>0.67</sub> Nb <sub>0.33</sub> ) <sub>2</sub> InB <sub>2</sub> |
|                                                        |                                                              |                                            | (Ti <sub>0.67</sub> Zr <sub>0.33</sub> ) <sub>2</sub> InB <sub>2</sub> |
|                                                        |                                                              |                                            | (Ti <sub>0.67</sub> Hf <sub>0.33</sub> ) <sub>2</sub> InB <sub>2</sub> |
|                                                        |                                                              |                                            | (Ti <sub>0.67</sub> Nb <sub>0.33</sub> ) <sub>2</sub> InB <sub>2</sub> |
|                                                        |                                                              |                                            | (Ti <sub>0.67</sub> Ta <sub>0.33</sub> ) <sub>2</sub> InB <sub>2</sub> |
|                                                        |                                                              |                                            | (Zr <sub>0.67</sub> Ti <sub>0.33</sub> ) <sub>2</sub> InB <sub>2</sub> |
|                                                        |                                                              |                                            | (Zr <sub>0.67</sub> Hf <sub>0.33</sub> ) <sub>2</sub> InB <sub>2</sub> |
|                                                        |                                                              |                                            | (Zr <sub>0.67</sub> Nb <sub>0.33</sub> ) <sub>2</sub> InB <sub>2</sub> |
|                                                        |                                                              |                                            | (Hf <sub>0.67</sub> Ti <sub>0.33</sub> ) <sub>2</sub> InB <sub>2</sub> |
|                                                        |                                                              |                                            | (Hf <sub>0.67</sub> Zr <sub>0.33</sub> ) <sub>2</sub> InB <sub>2</sub> |
|                                                        |                                                              |                                            | (Hf <sub>0.67</sub> Nb <sub>0.33</sub> ) <sub>2</sub> InB <sub>2</sub> |
|                                                        |                                                              |                                            | (Nb <sub>0.67</sub> Ti <sub>0.33</sub> ) <sub>2</sub> InB <sub>2</sub> |
|                                                        |                                                              |                                            | (Sc <sub>0.67</sub> Nb <sub>0.33</sub> ) <sub>2</sub> GeB <sub>2</sub> |
|                                                        |                                                              |                                            | (Sc <sub>0.67</sub> Ta <sub>0.33</sub> ) <sub>2</sub> GeB <sub>2</sub> |
|                                                        |                                                              |                                            | (Ti <sub>0.67</sub> Ta <sub>0.33</sub> ) <sub>2</sub> GeB <sub>2</sub> |
|                                                        |                                                              |                                            | (Nb <sub>0.67</sub> Sc <sub>0.33</sub> ) <sub>2</sub> GeB <sub>2</sub> |
|                                                        |                                                              |                                            | (Nb <sub>0.67</sub> Mo <sub>0.33</sub> ) <sub>2</sub> GeB <sub>2</sub> |
|                                                        |                                                              |                                            | (Mo <sub>0.67</sub> Sc <sub>0.33</sub> ) <sub>2</sub> GeB <sub>2</sub> |
|                                                        |                                                              |                                            | (Sc <sub>0.67</sub> Nb <sub>0.33</sub> ) <sub>2</sub> SnB <sub>2</sub> |
|                                                        |                                                              |                                            | (Ti <sub>0.67</sub> Hf <sub>0.33</sub> ) <sub>2</sub> SnB <sub>2</sub> |
|                                                        |                                                              |                                            | (Ti <sub>0.67</sub> Nb <sub>0.33</sub> ) <sub>2</sub> SnB <sub>2</sub> |
|                                                        |                                                              |                                            | (Zr <sub>0.67</sub> Hf <sub>0.33</sub> ) <sub>2</sub> SnB <sub>2</sub> |
|                                                        |                                                              |                                            | (Hf <sub>0.67</sub> Ti <sub>0.33</sub> ) <sub>2</sub> SnB <sub>2</sub> |
|                                                        |                                                              |                                            | (Hf <sub>0.67</sub> Zr <sub>0.33</sub> ) <sub>2</sub> SnB <sub>2</sub> |
|                                                        |                                                              |                                            | (Hf <sub>0.67</sub> Nb <sub>0.33</sub> ) <sub>2</sub> SnB <sub>2</sub> |

Table S6. Experimentally reported and theoretically predicted quaternary disordered solid solution MAB phases with *Cmmm* symmetry. The unit for  $\Delta G_{\text{solid solution}}$  is in meV/atom.

| Phase                                                                  | Stability criteria                                           | Experimentally reported and here predicted                                          | Predicted                                                              |
|------------------------------------------------------------------------|--------------------------------------------------------------|-------------------------------------------------------------------------------------|------------------------------------------------------------------------|
| <i>Cmmm</i> , solid solution                                           | $\Delta G_{\text{solid solution}} \leq 0$                    | (Mn <sub>0.67</sub> Fe <sub>0.33</sub> ) <sub>2</sub> AlB <sub>2</sub> <sup>3</sup> | (Cr <sub>0.67</sub> V <sub>0.33</sub> ) <sub>2</sub> AlB <sub>2</sub>  |
| (M' <sub>0.67</sub> M'' <sub>0.33</sub> ) <sub>2</sub> AB <sub>2</sub> | $\Delta G_{\text{solid solution}} < \Delta H_{i\text{-MAB}}$ | (Fe <sub>0.67</sub> Mn <sub>0.33</sub> ) <sub>2</sub> AlB <sub>2</sub> <sup>3</sup> | (Cr <sub>0.67</sub> Mo <sub>0.33</sub> ) <sub>2</sub> AlB <sub>2</sub> |
|                                                                        |                                                              | (Cr <sub>0.67</sub> Mn <sub>0.33</sub> ) <sub>2</sub> AlB <sub>2</sub> <sup>9</sup> | (Cr <sub>0.67</sub> W <sub>0.33</sub> ) <sub>2</sub> AlB <sub>2</sub>  |
|                                                                        |                                                              | (Mn <sub>0.67</sub> Cr <sub>0.33</sub> ) <sub>2</sub> AlB <sub>2</sub> <sup>9</sup> | (Cr <sub>0.67</sub> Fe <sub>0.33</sub> ) <sub>2</sub> AlB <sub>2</sub> |
|                                                                        |                                                              |                                                                                     | (Mo <sub>0.67</sub> Cr <sub>0.33</sub> ) <sub>2</sub> AlB <sub>2</sub> |
|                                                                        |                                                              |                                                                                     | (Mo <sub>0.67</sub> W <sub>0.33</sub> ) <sub>2</sub> AlB <sub>2</sub>  |
|                                                                        |                                                              |                                                                                     | (Mn <sub>0.67</sub> V <sub>0.33</sub> ) <sub>2</sub> AlB <sub>2</sub>  |
|                                                                        |                                                              |                                                                                     | (Fe <sub>0.67</sub> Cr <sub>0.33</sub> ) <sub>2</sub> AlB <sub>2</sub> |
|                                                                        |                                                              |                                                                                     | (Fe <sub>0.67</sub> Co <sub>0.33</sub> ) <sub>2</sub> AlB <sub>2</sub> |
|                                                                        |                                                              |                                                                                     | (Co <sub>0.67</sub> Fe <sub>0.33</sub> ) <sub>2</sub> AlB <sub>2</sub> |
|                                                                        |                                                              |                                                                                     | (Cr <sub>0.67</sub> Mn <sub>0.33</sub> ) <sub>2</sub> SiB <sub>2</sub> |

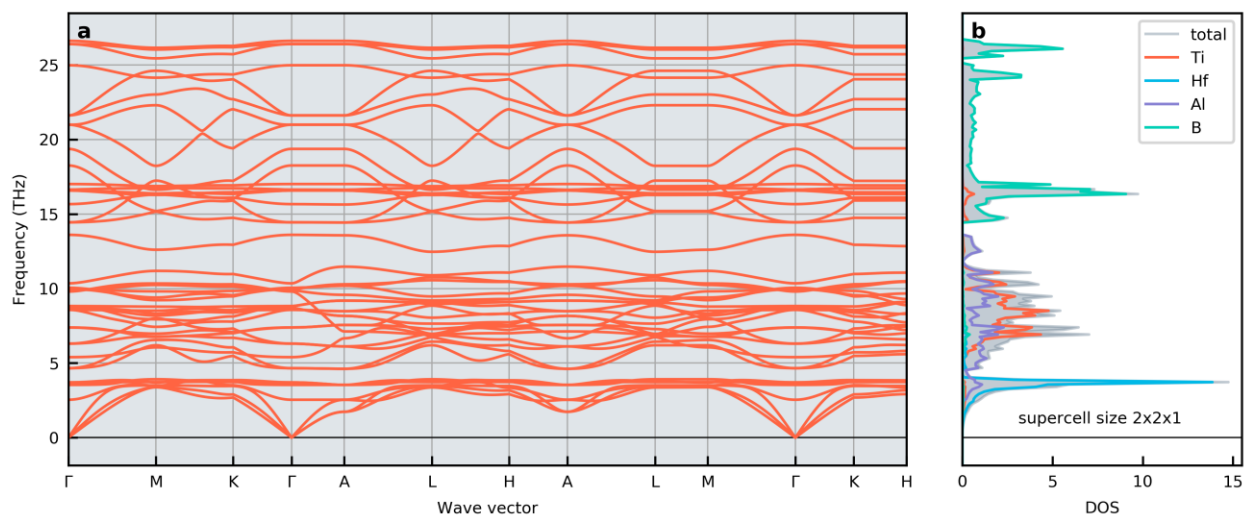

Figure S5. Phonon dispersion and phonon DOS for  $\text{Ti}_{4/3}\text{Hf}_{2/3}\text{AlB}_2$  with  $P\bar{6}2m$  symmetry.

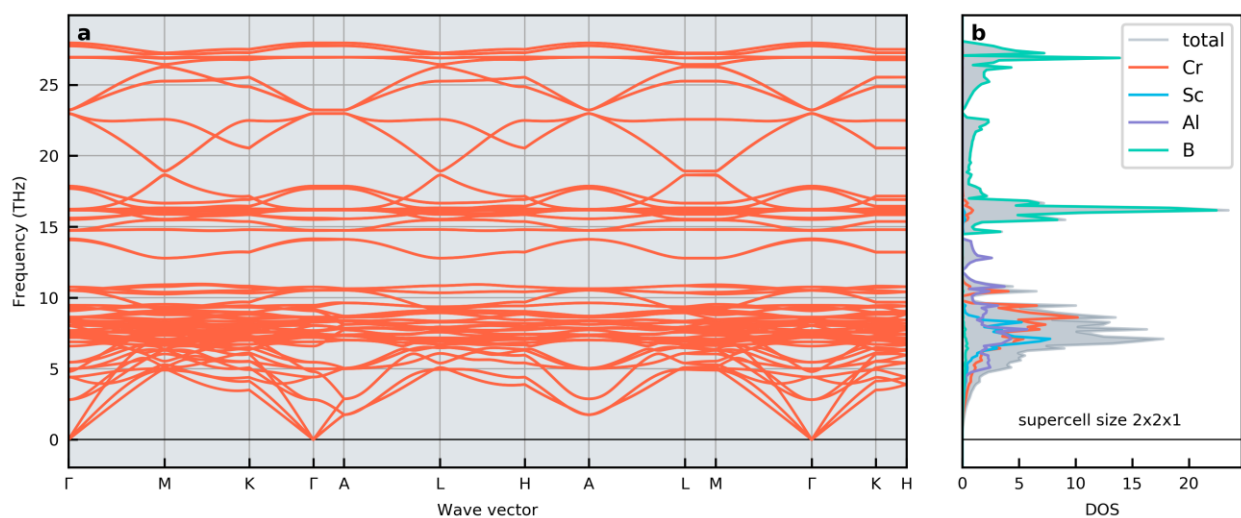

Figure S6. Phonon dispersion and phonon DOS for  $\text{Cr}_{4/3}\text{Sc}_{2/3}\text{AlB}_2$  with  $P\bar{6}2c$  symmetry.

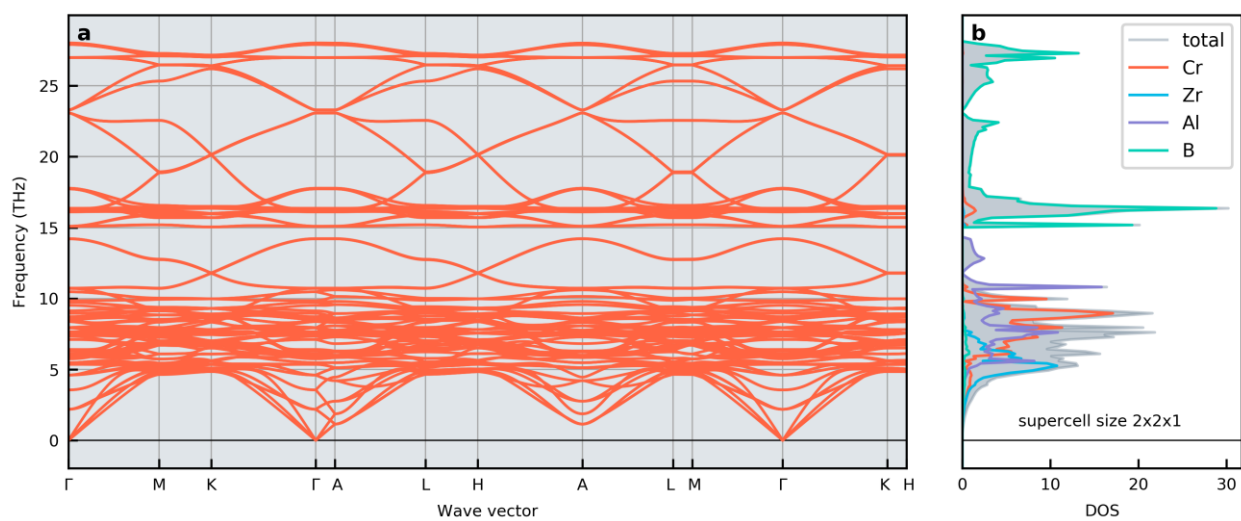

Figure S7. Phonon dispersion and phonon DOS for  $\text{Cr}_{4/3}\text{Zr}_{2/3}\text{AlB}_2$  with  $R\bar{3}m$  symmetry.

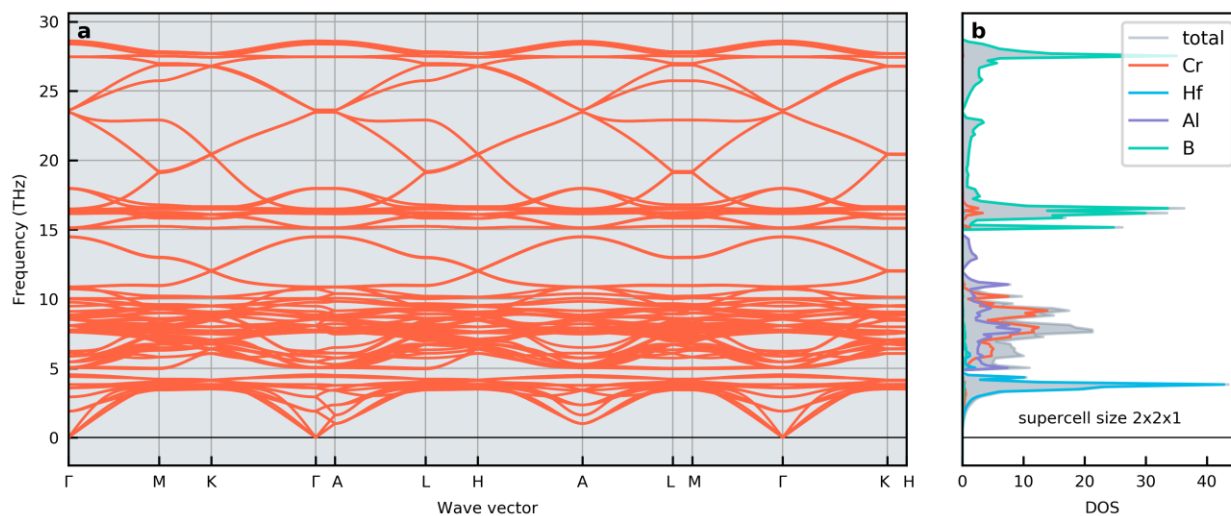

Figure S8. Phonon dispersion and phonon DOS for  $\text{Cr}_{4/3}\text{Hf}_{2/3}\text{AlB}_2$  with  $R\bar{3}m$  symmetry.

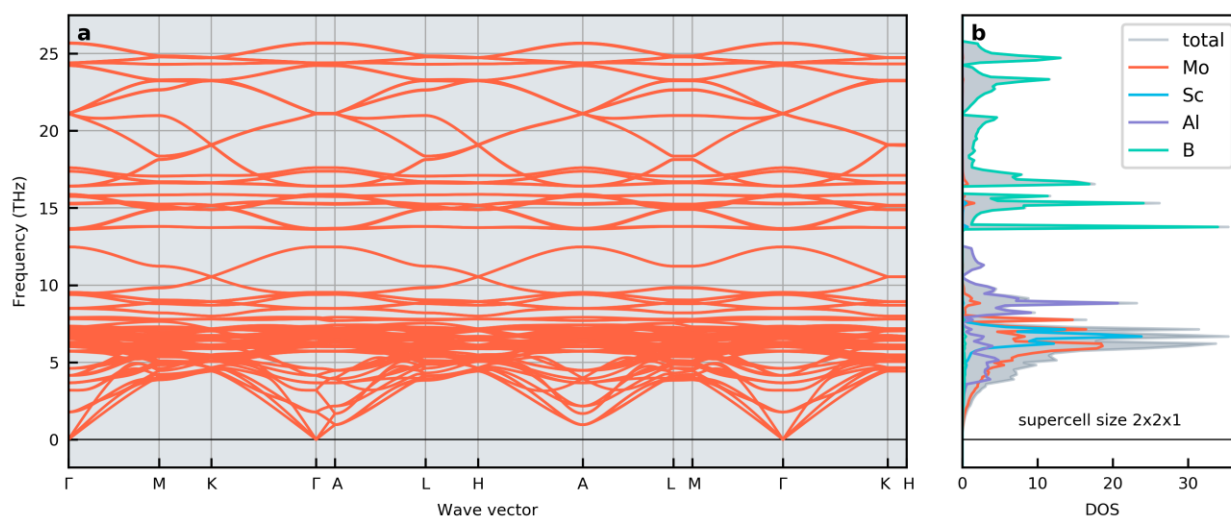

Figure S9. Phonon dispersion and phonon DOS for  $\text{Mo}_{4/3}\text{Sc}_{2/3}\text{AlB}_2$  with  $R\bar{3}m$  symmetry.

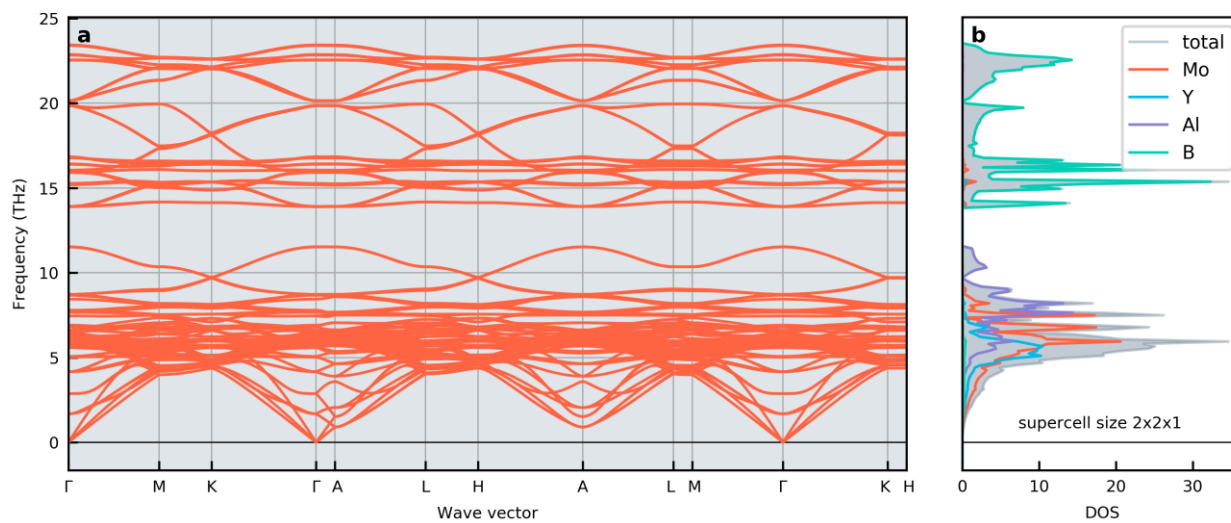

Figure S10. Phonon dispersion and phonon DOS for  $\text{Mo}_{4/3}\text{Y}_{2/3}\text{AlB}_2$  with  $R\bar{3}m$  symmetry.



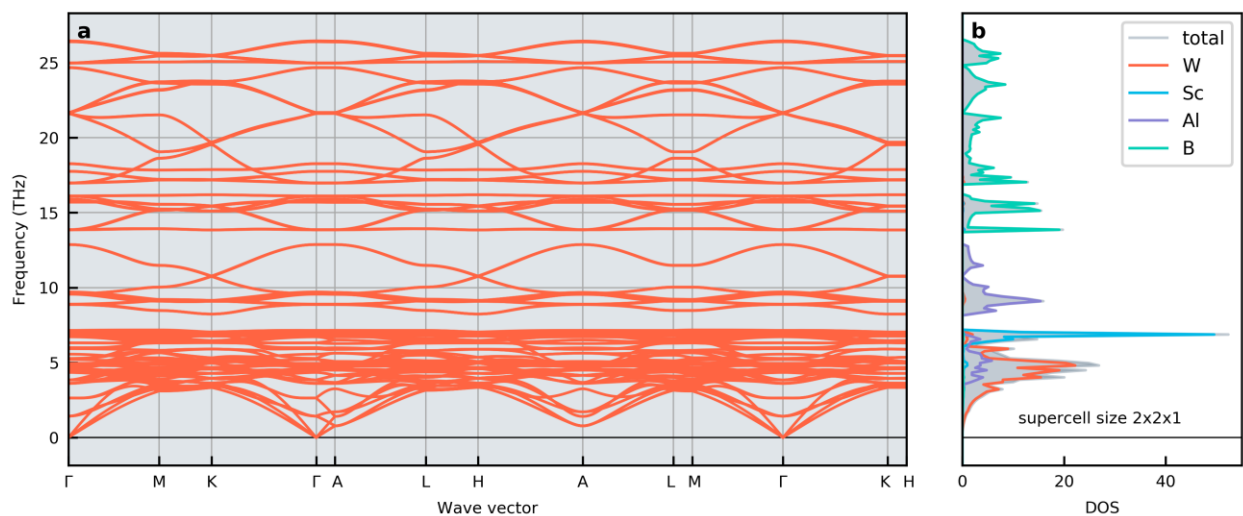

Figure S11. Phonon dispersion and phonon DOS for  $W_{4/3}Sc_{2/3}AlB_2$  with  $R\bar{3}m$  symmetry.

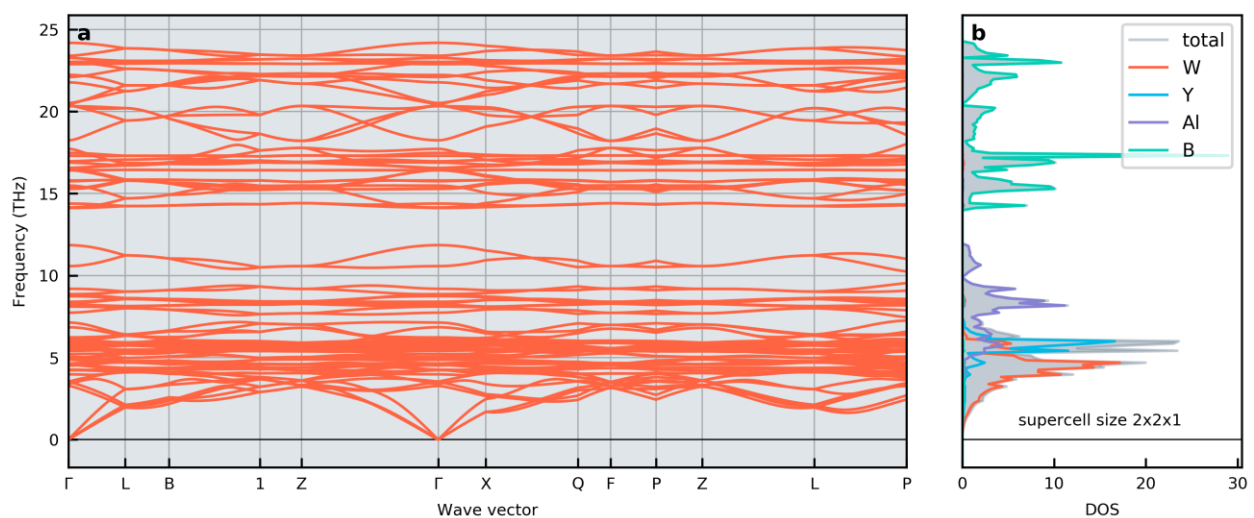

Figure S12. Phonon dispersion and phonon DOS for  $W_{4/3}Y_{2/3}AlB_2$  with  $C_2$  symmetry.

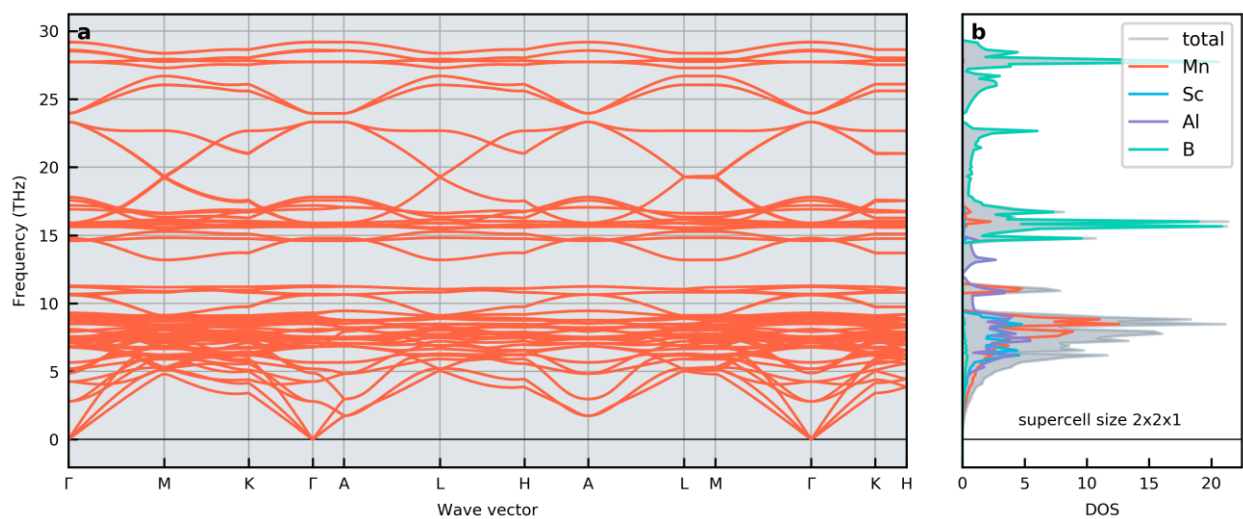

Figure S13. Phonon dispersion and phonon DOS for  $Mn_{4/3}Sc_{2/3}AlB_2$  with  $P\bar{6}2c$  symmetry.

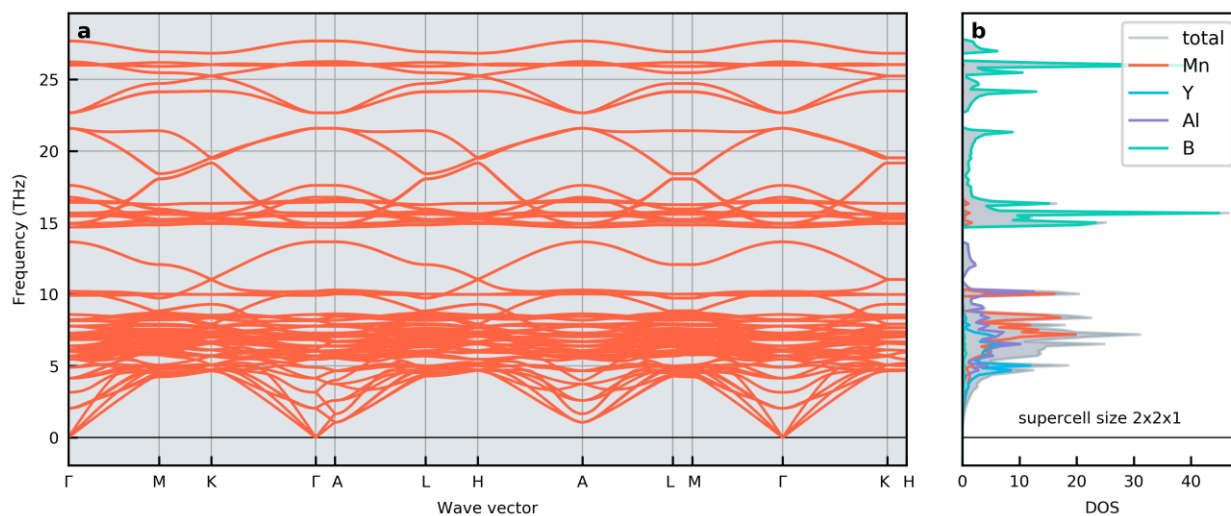

Figure S14. Phonon dispersion and phonon DOS for  $\text{Mn}_{4/3}\text{Y}_{2/3}\text{AlB}_2$  with  $R\bar{3}m$  symmetry.

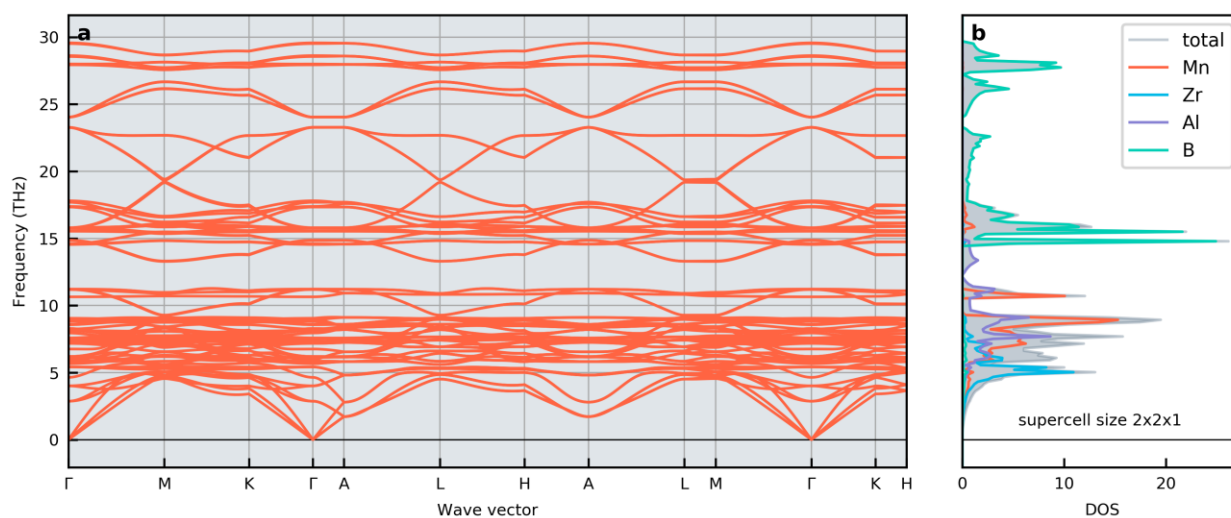

Figure S15. Phonon dispersion and phonon DOS for  $\text{Mn}_{4/3}\text{Zr}_{2/3}\text{AlB}_2$  with  $P\bar{6}2c$  symmetry.

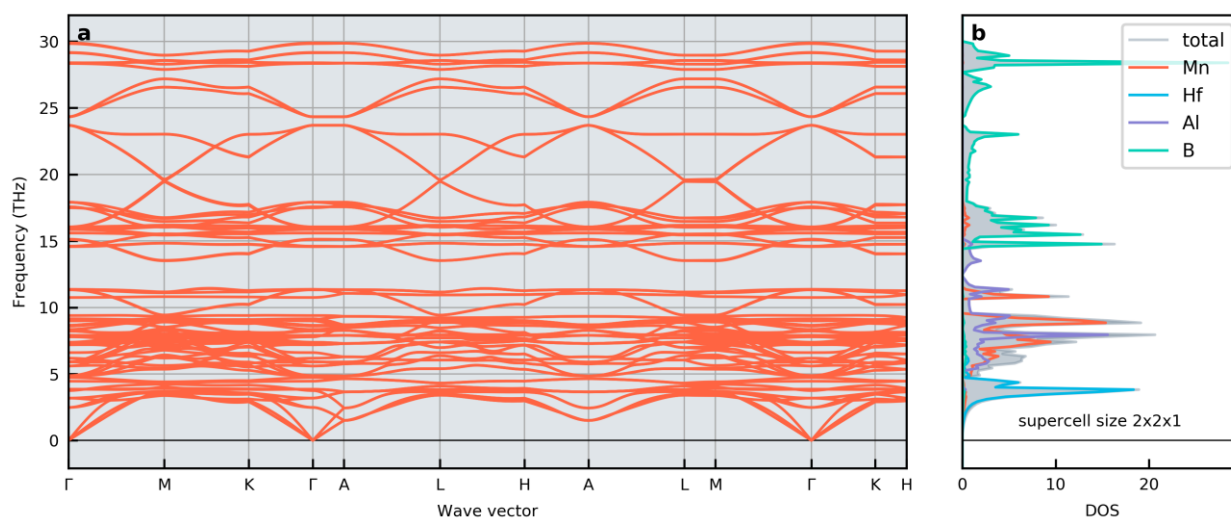

Figure S16. Phonon dispersion and phonon DOS for  $\text{Mn}_{4/3}\text{Hf}_{2/3}\text{AlB}_2$  with  $P\bar{6}2c$  symmetry.



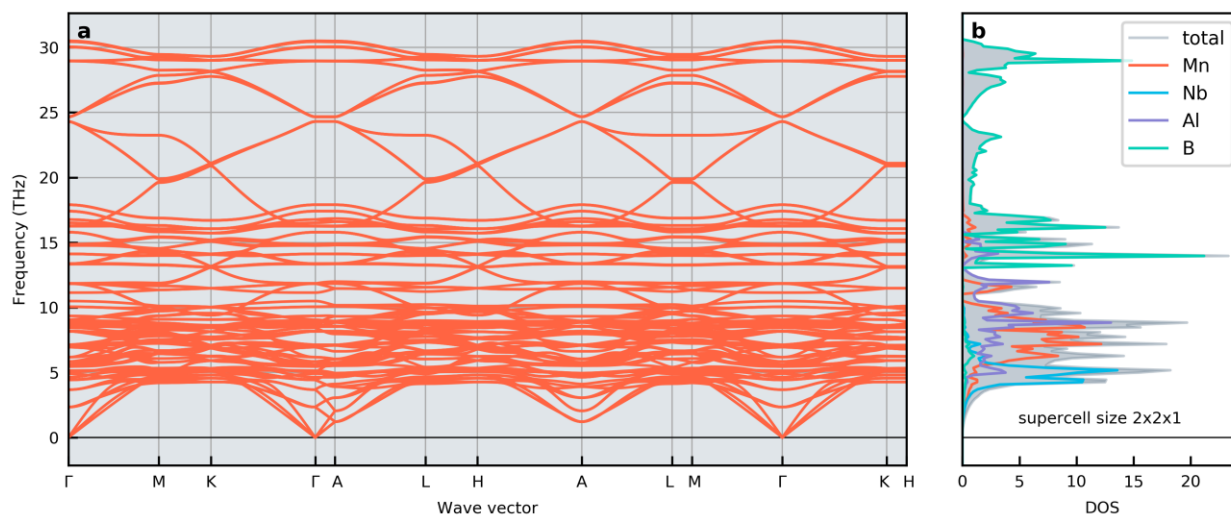

Figure S17. Phonon dispersion and phonon DOS for  $\text{Mn}_{4/3}\text{Nb}_{2/3}\text{AlB}_2$  with  $R\bar{3}m$  symmetry.

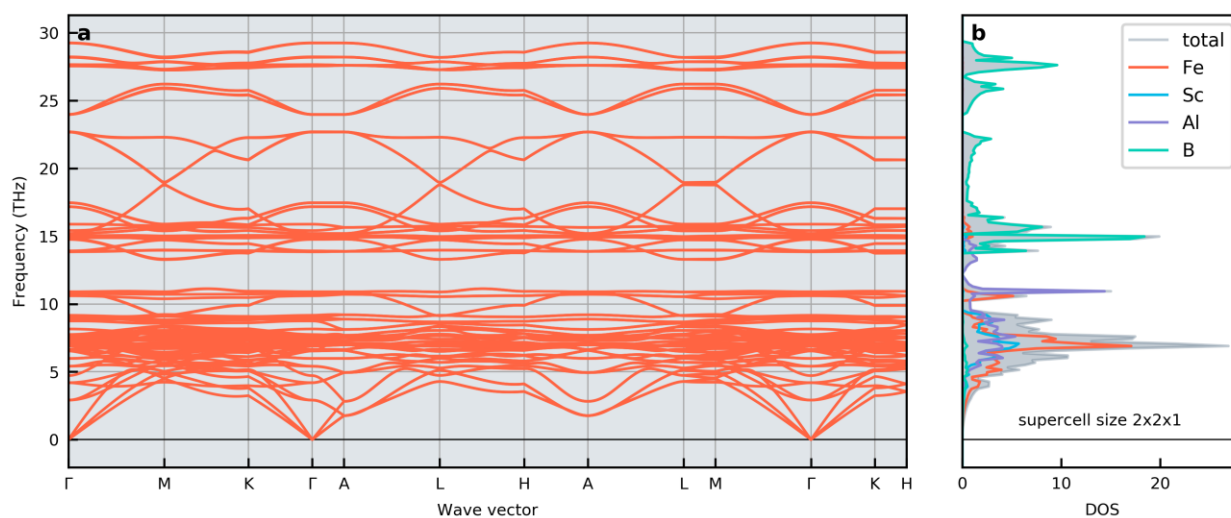

Figure S18. Phonon dispersion and phonon DOS for  $\text{Fe}_{4/3}\text{Sc}_{2/3}\text{AlB}_2$  with  $P\bar{6}2c$  symmetry.

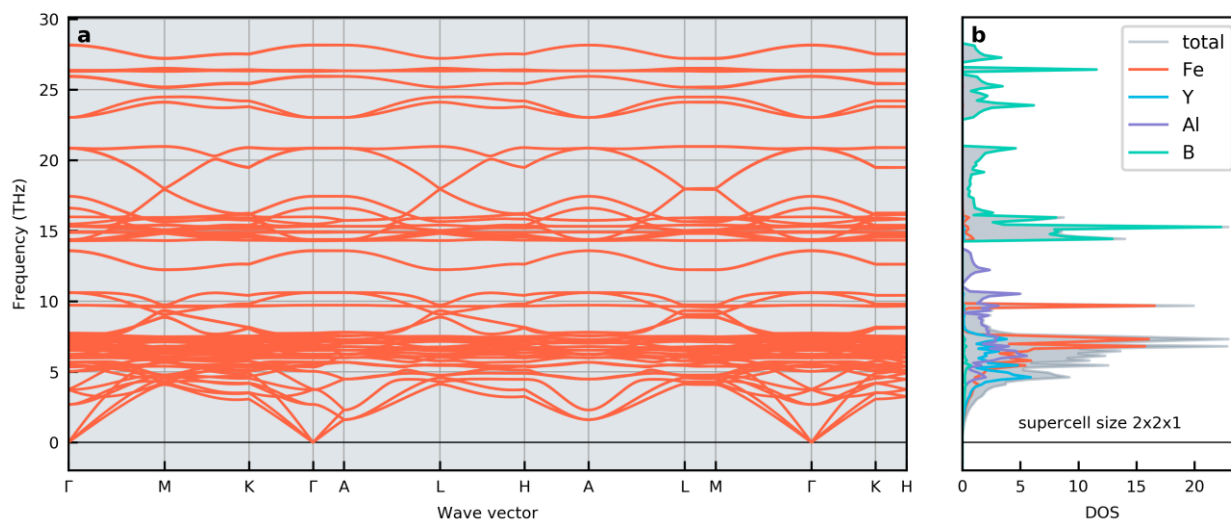

Figure S19. Phonon dispersion and phonon DOS for  $\text{Fe}_{4/3}\text{Y}_{2/3}\text{AlB}_2$  with  $P\bar{6}2c$  symmetry.

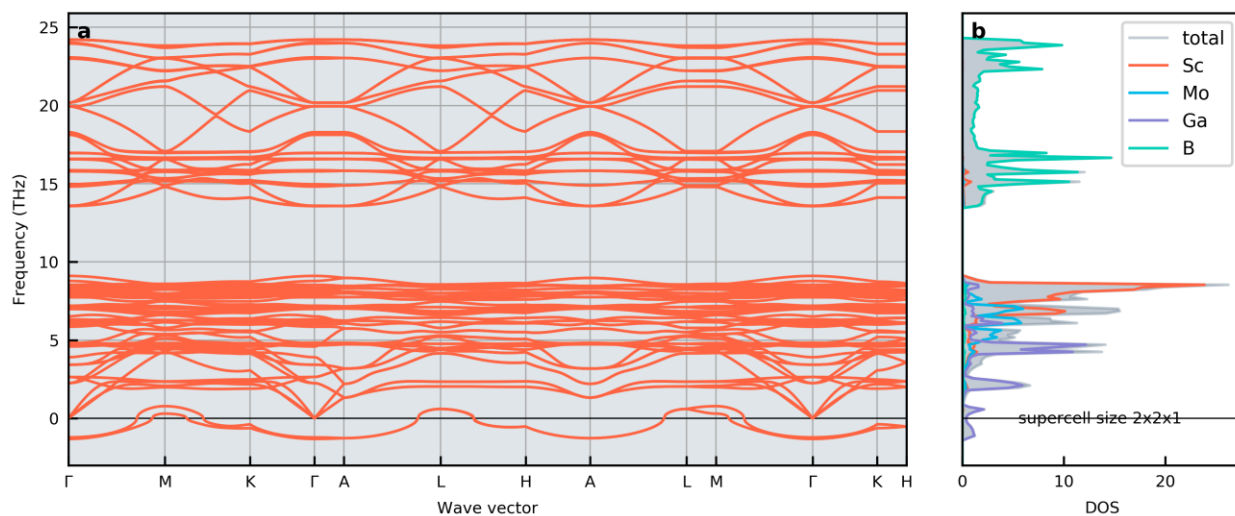

Figure S20. Phonon dispersion and phonon DOS for  $\text{Sc}_{4/3}\text{Mo}_{2/3}\text{GaB}_2$  with  $P\bar{6}2c$  symmetry.

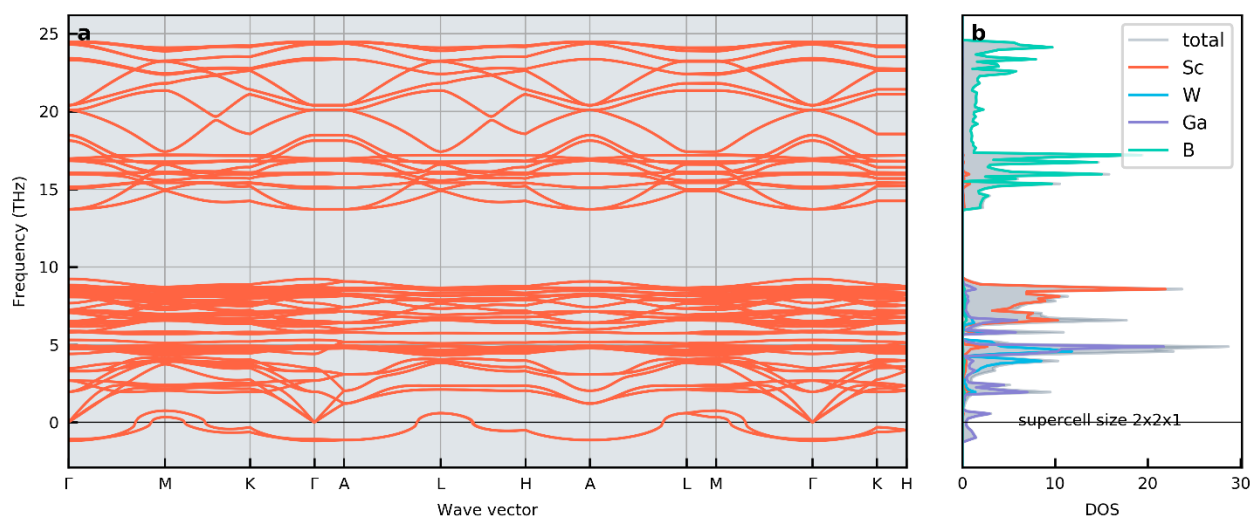

Figure S21. Phonon dispersion and phonon DOS for  $\text{Sc}_{4/3}\text{W}_{2/3}\text{GaB}_2$  with  $P\bar{6}2c$  symmetry.

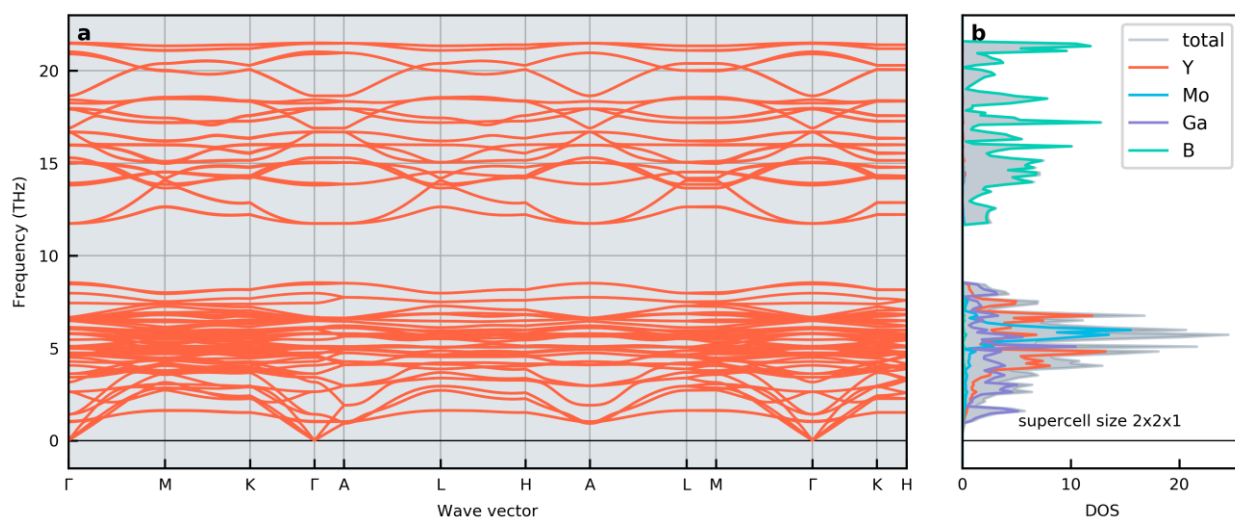

Figure S22. Phonon dispersion and phonon DOS for  $\text{Y}_{4/3}\text{Mo}_{2/3}\text{GaB}_2$  with  $P\bar{6}2c$  symmetry.

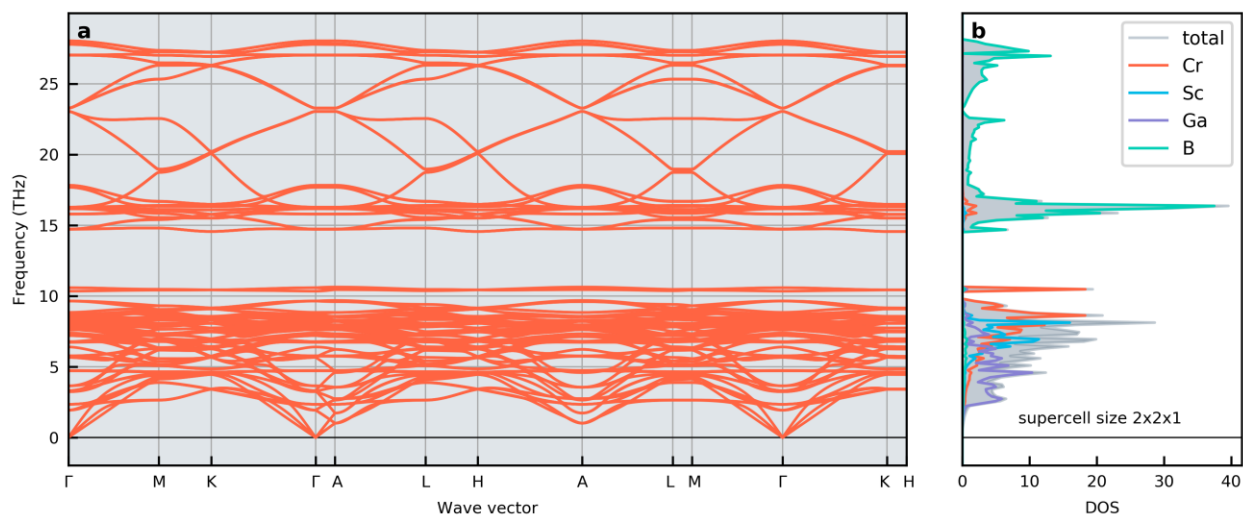

Figure S23. Phonon dispersion and phonon DOS for  $\text{Cr}_{4/3}\text{Sc}_{2/3}\text{GaB}_2$  with  $R\bar{3}m$  symmetry.

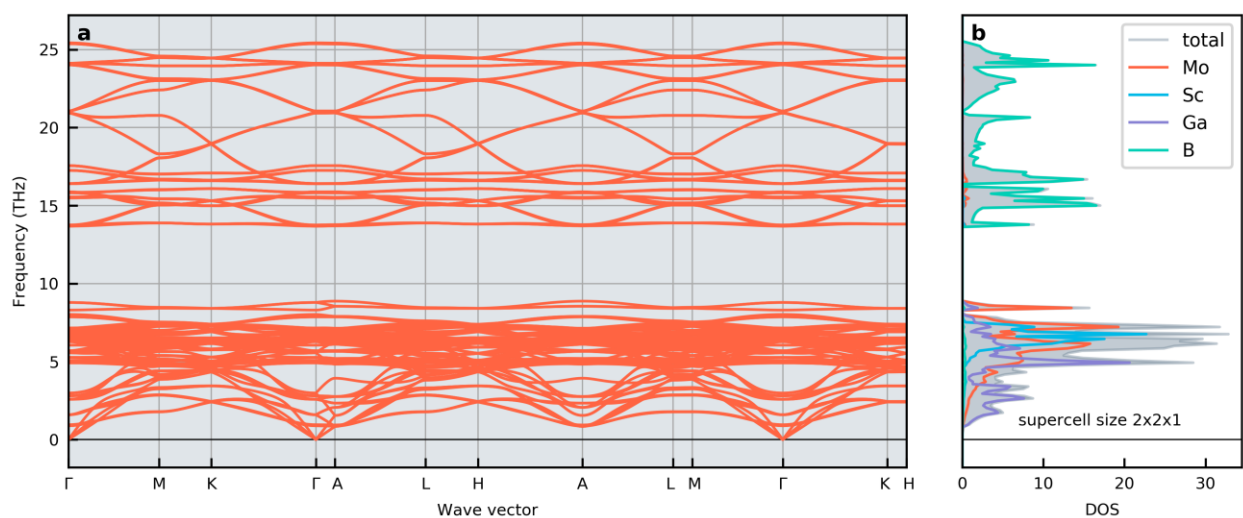

Figure S24. Phonon dispersion and phonon DOS for  $\text{Mo}_{4/3}\text{Sc}_{2/3}\text{GaB}_2$  with  $R\bar{3}m$  symmetry.

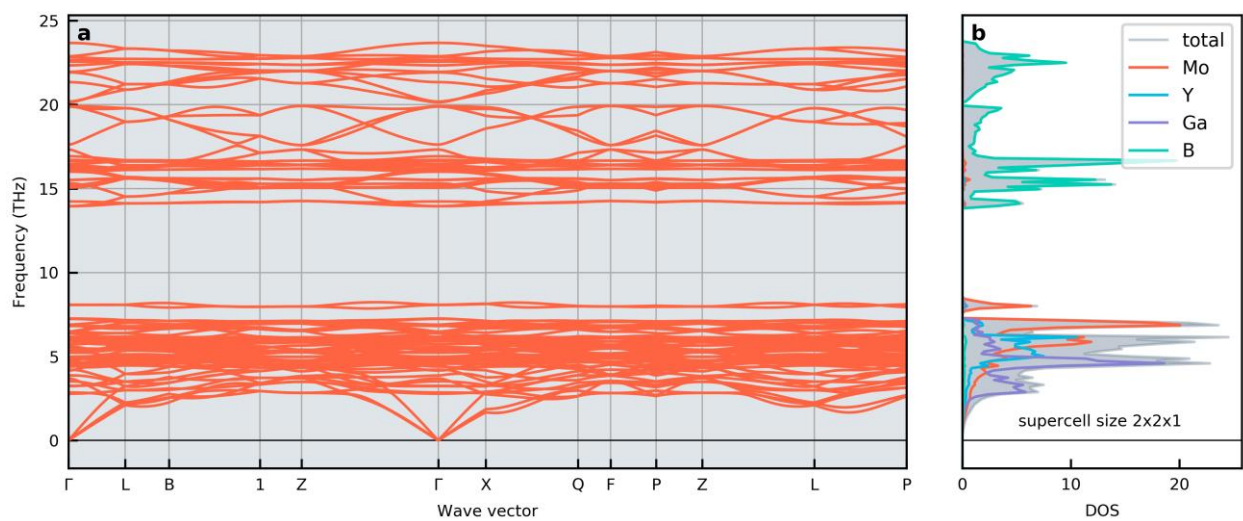

Figure S25. Phonon dispersion and phonon DOS for  $\text{Mo}_{4/3}\text{Y}_{2/3}\text{GaB}_2$  with  $C2$  symmetry.

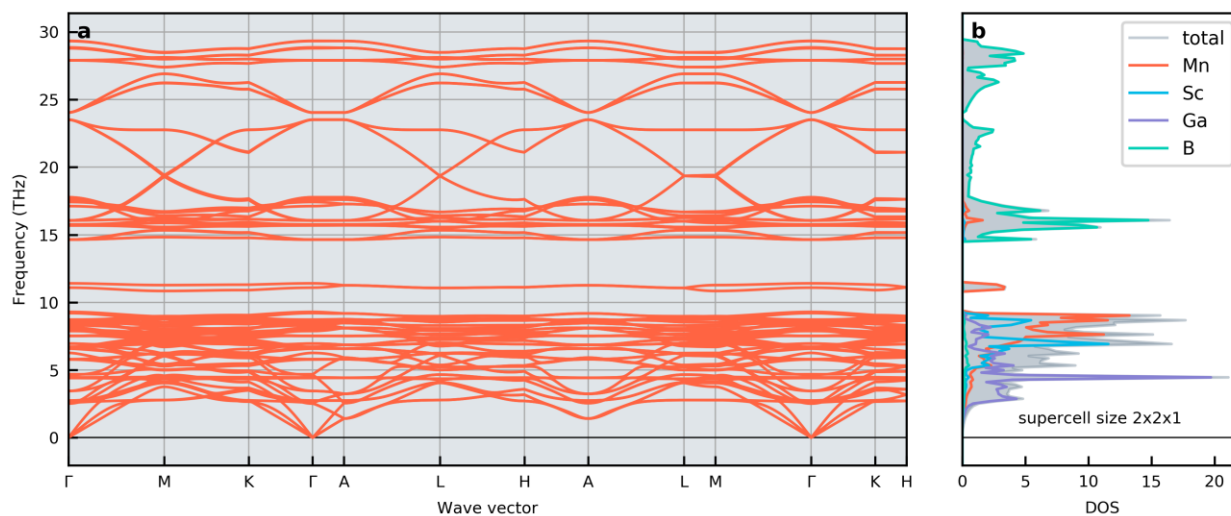

Figure S26. Phonon dispersion and phonon DOS for  $\text{Mn}_{4/3}\text{Sc}_{2/3}\text{GaB}_2$  with  $P\bar{6}2c$  symmetry

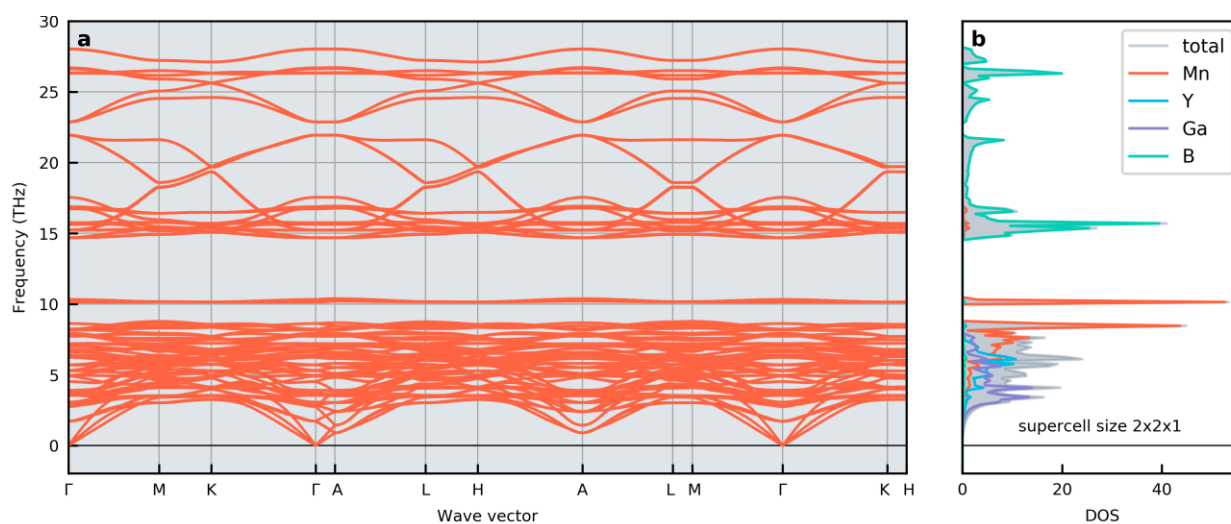

Figure S27. Phonon dispersion and phonon DOS for  $\text{Mn}_{4/3}\text{Y}_{2/3}\text{GaB}_2$  with  $R\bar{3}m$  symmetry.

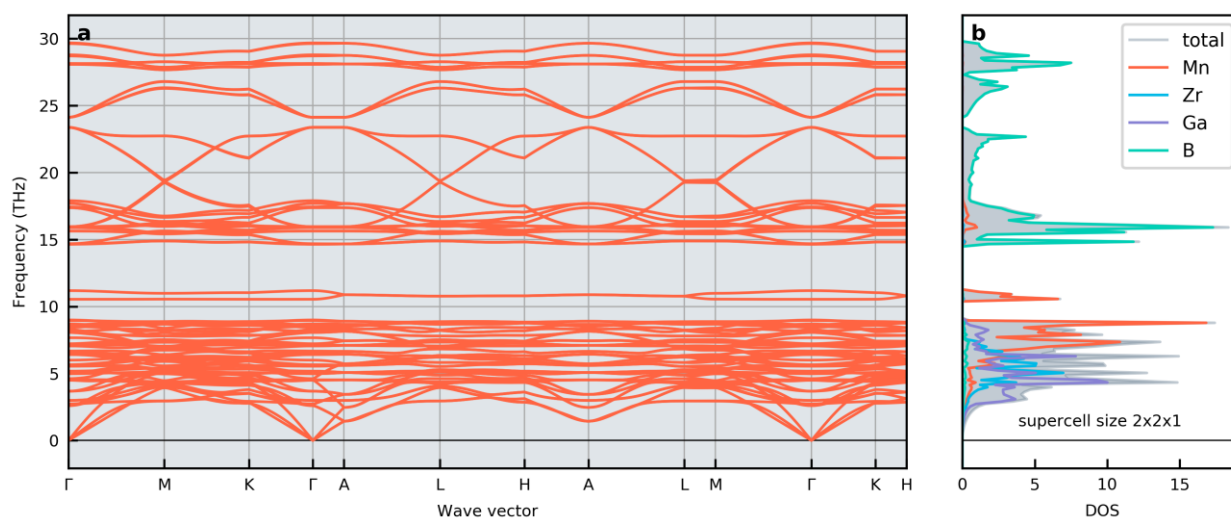

Figure S28. Phonon dispersion and phonon DOS for  $\text{Mn}_{4/3}\text{Zr}_{2/3}\text{GaB}_2$  with  $P\bar{6}2c$  symmetry



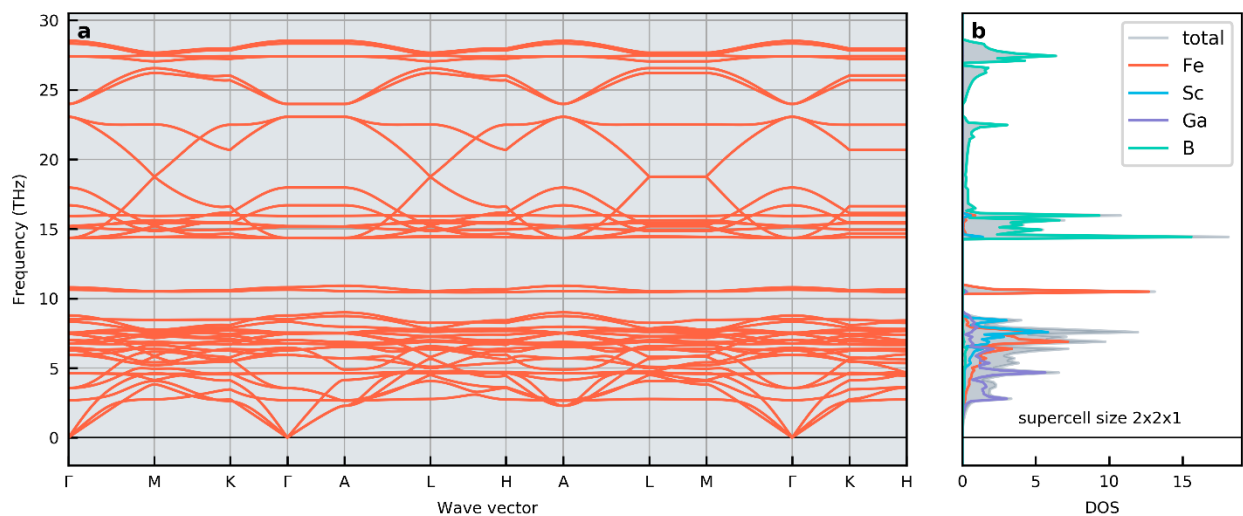

Figure S29. Phonon dispersion and phonon DOS for  $\text{Fe}_{4/3}\text{Sc}_{2/3}\text{GaB}_2$  with  $P\bar{6}2m$  symmetry

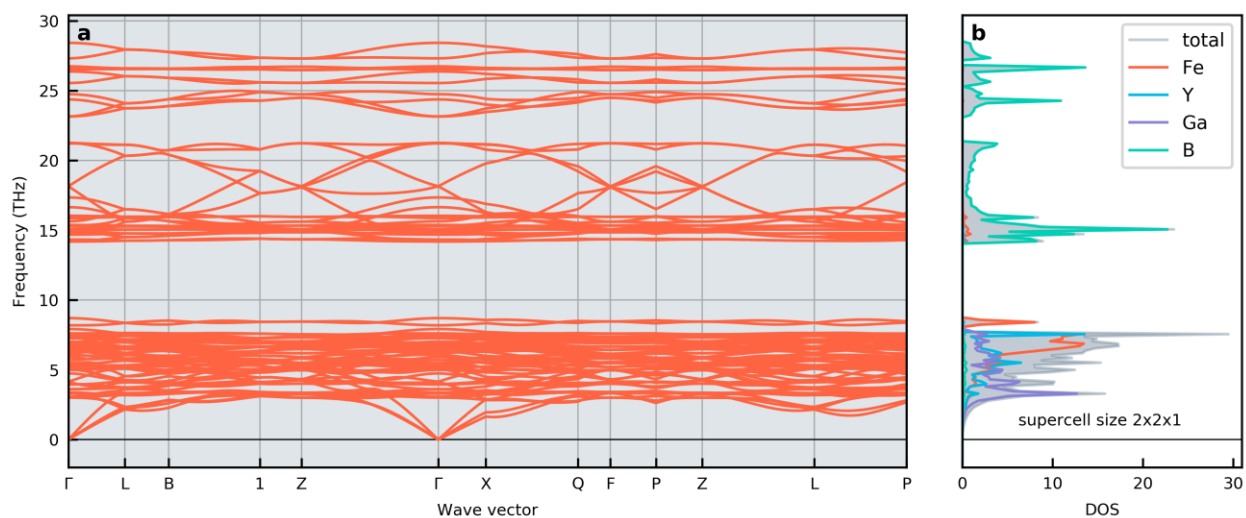

Figure S30. Phonon dispersion and phonon DOS for  $\text{Fe}_{4/3}\text{Y}_{2/3}\text{GaB}_2$  with  $C2$  symmetry.

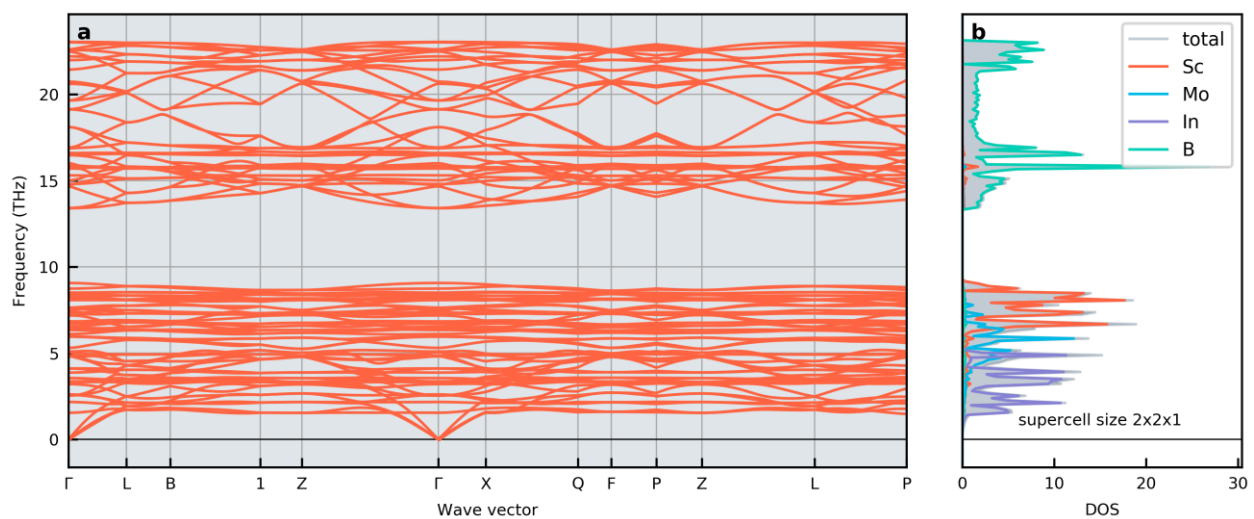

Figure S31. Phonon dispersion and phonon DOS for  $\text{Sc}_{4/3}\text{Mo}_{2/3}\text{InB}_2$  with  $C2$  symmetry.

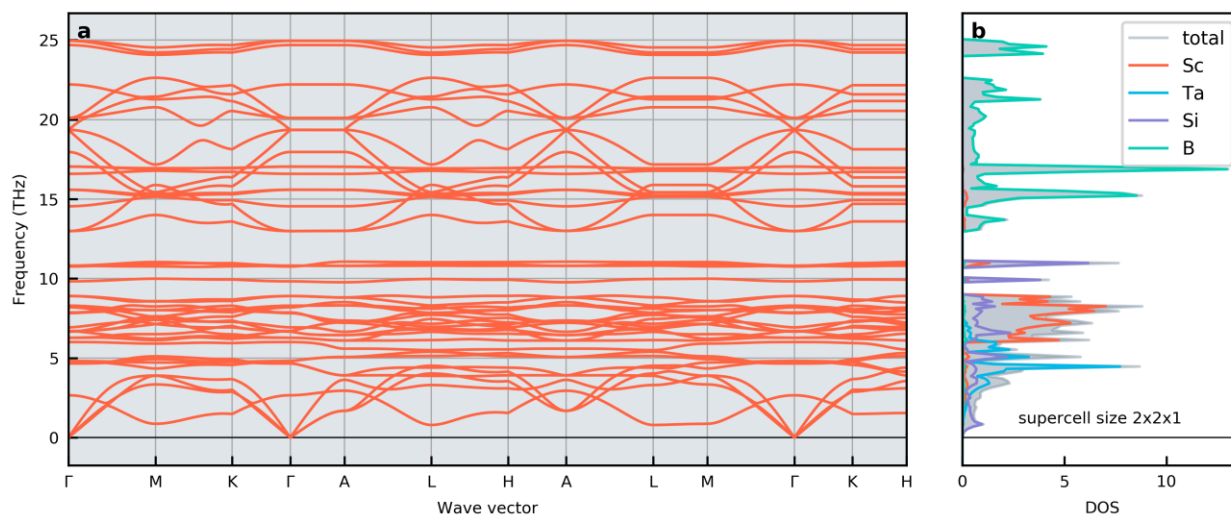

Figure S32. Phonon dispersion and phonon DOS for  $\text{Sc}_{4/3}\text{Ta}_{2/3}\text{SiB}_2$  with  $P\bar{6}2m$  symmetry.

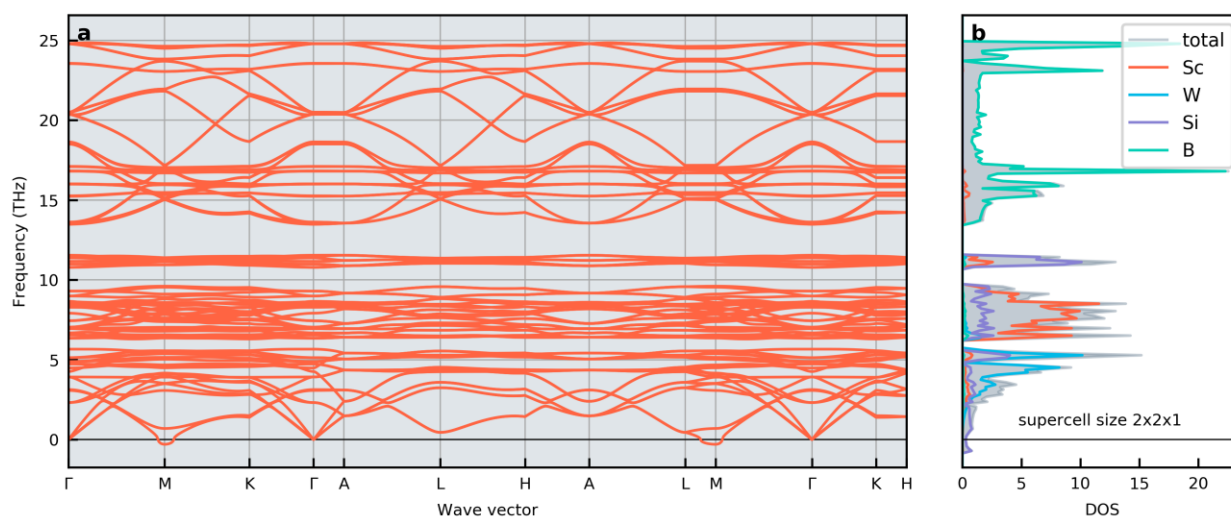

Figure S33. Phonon dispersion and phonon DOS for  $\text{Sc}_{4/3}\text{W}_{2/3}\text{SiB}_2$  with  $P\bar{6}2c$  symmetry.

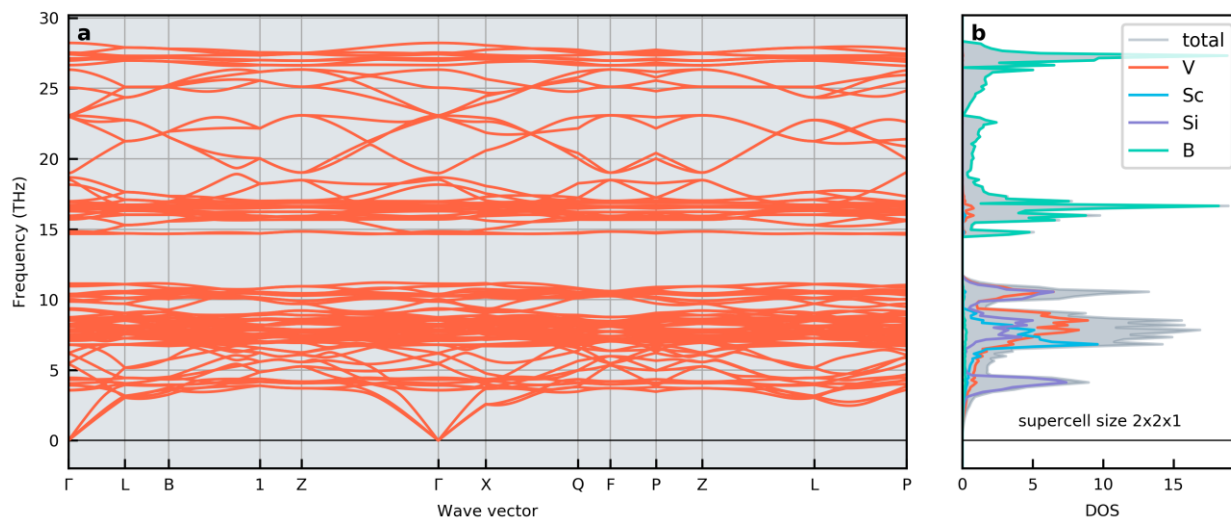

Figure S34. Phonon dispersion and phonon DOS for  $\text{V}_{4/3}\text{Sc}_{2/3}\text{SiB}_2$  with  $C2$  symmetry.

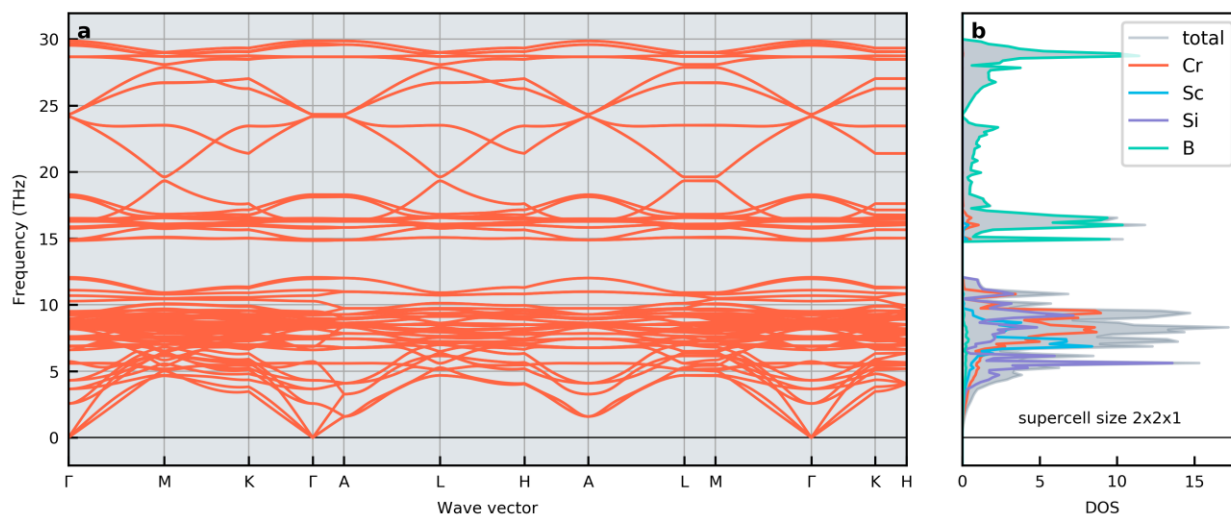

Figure S35. Phonon dispersion and phonon DOS for  $\text{Cr}_{4/3}\text{Sc}_{2/3}\text{SiB}_2$  with  $P\bar{6}2c$  symmetry.

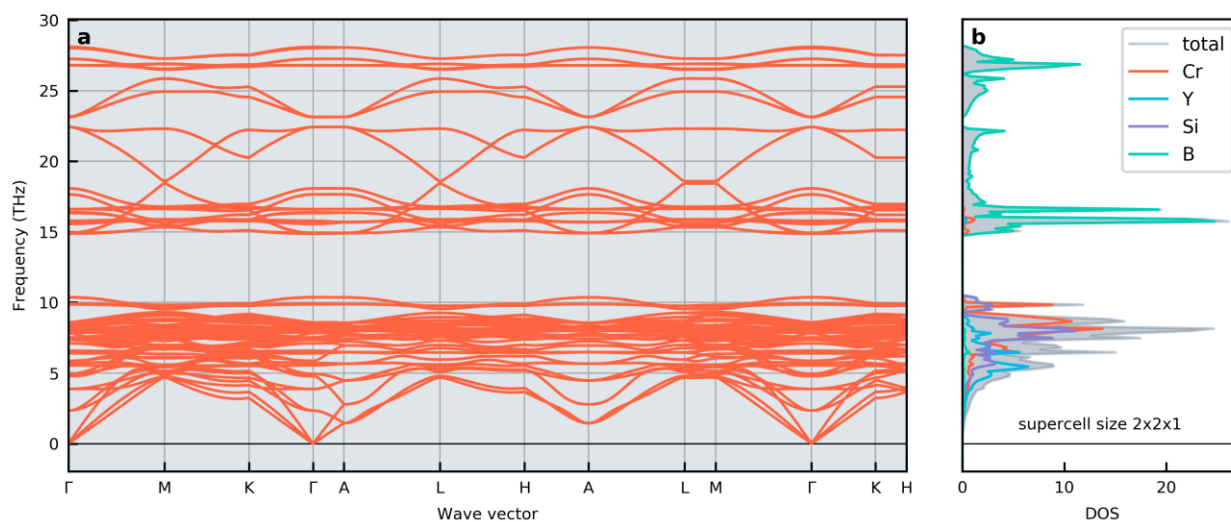

Figure S36. Phonon dispersion and phonon DOS for  $\text{Cr}_{4/3}\text{Y}_{2/3}\text{SiB}_2$  with  $P\bar{6}2c$  symmetry.

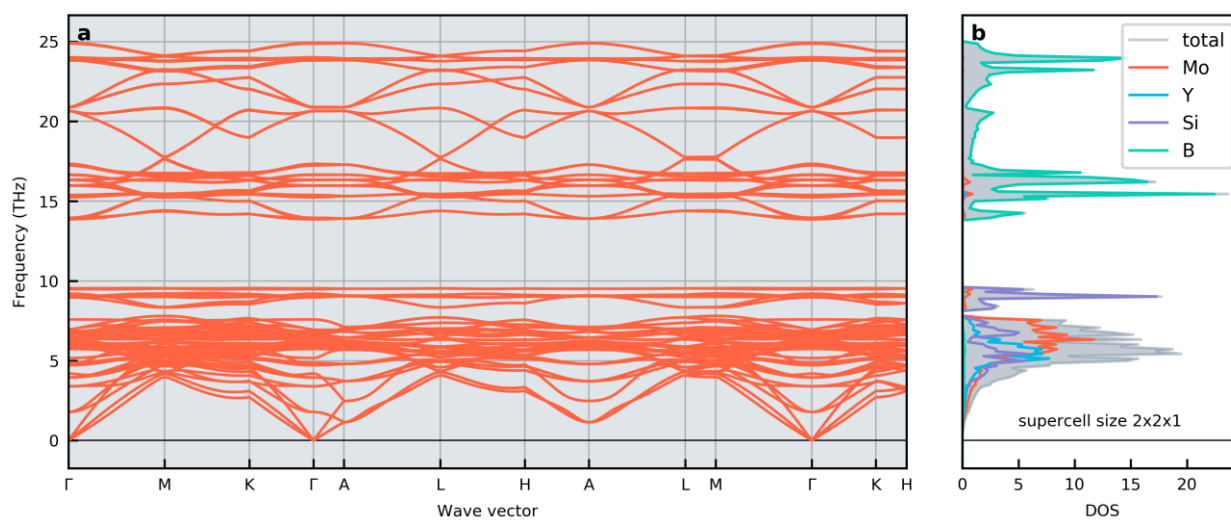

Figure S37. Phonon dispersion and phonon DOS for  $\text{Mo}_{4/3}\text{Y}_{2/3}\text{SiB}_2$  with  $P\bar{6}2c$  symmetry.

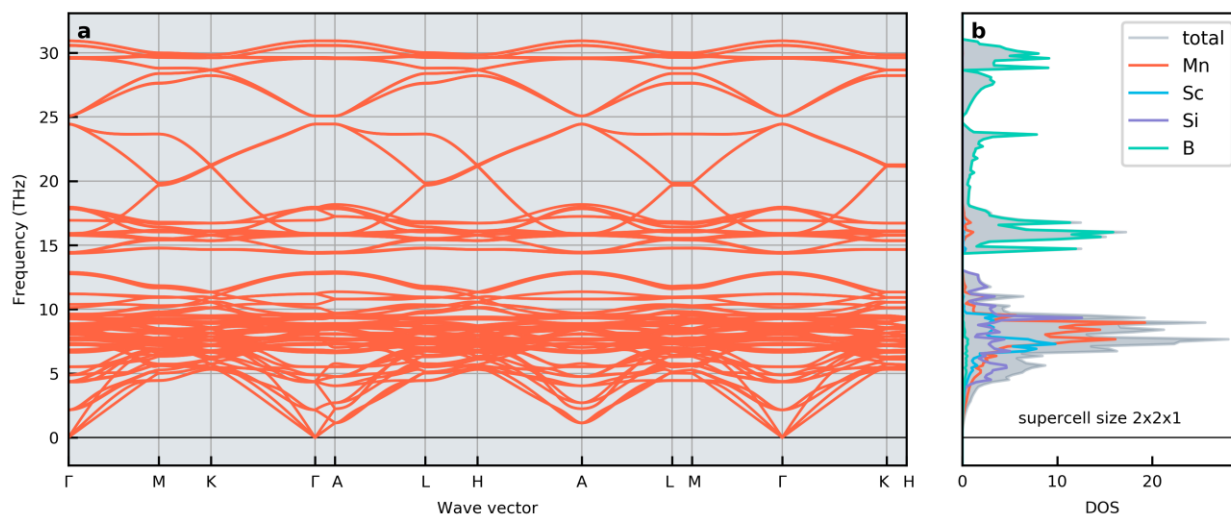

Figure S38. Phonon dispersion and phonon DOS for  $\text{Mn}_{4/3}\text{Sc}_{2/3}\text{SiB}_2$  with  $R\bar{3}m$  symmetry.

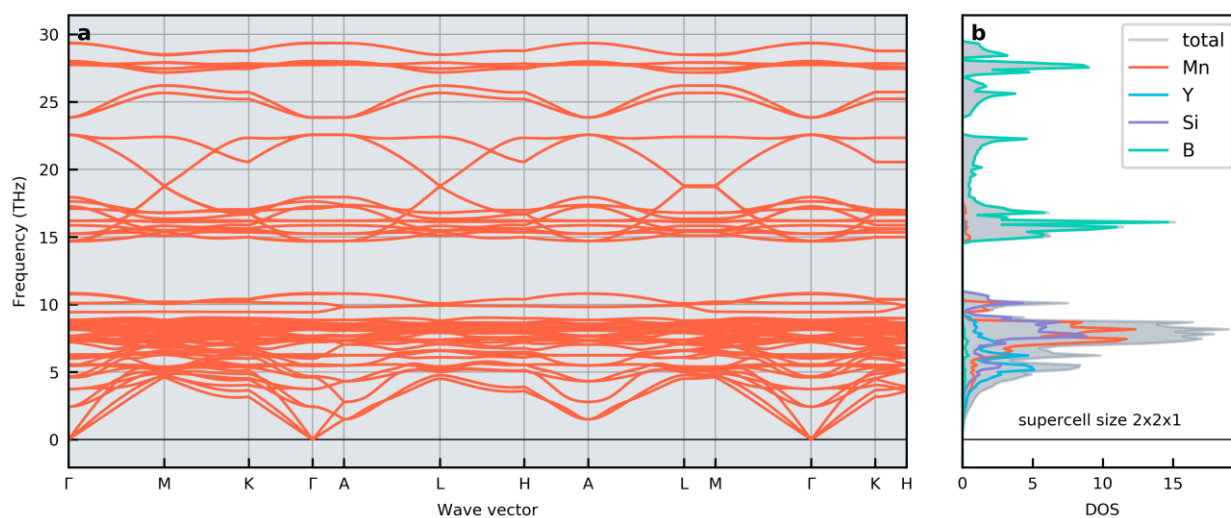

Figure S39. Phonon dispersion and phonon DOS for  $\text{Mn}_{4/3}\text{Y}_{2/3}\text{SiB}_2$  with  $P\bar{6}2c$  symmetry.

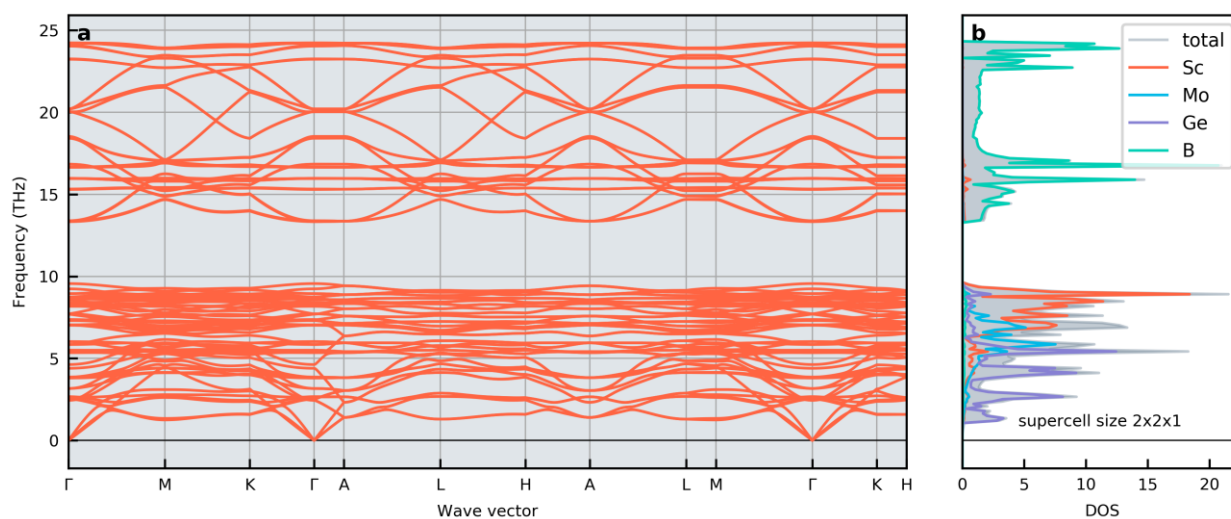

Figure S40. Phonon dispersion and phonon DOS for  $\text{Sc}_{4/3}\text{Mo}_{2/3}\text{GeB}_2$  with  $P\bar{6}2c$  symmetry.



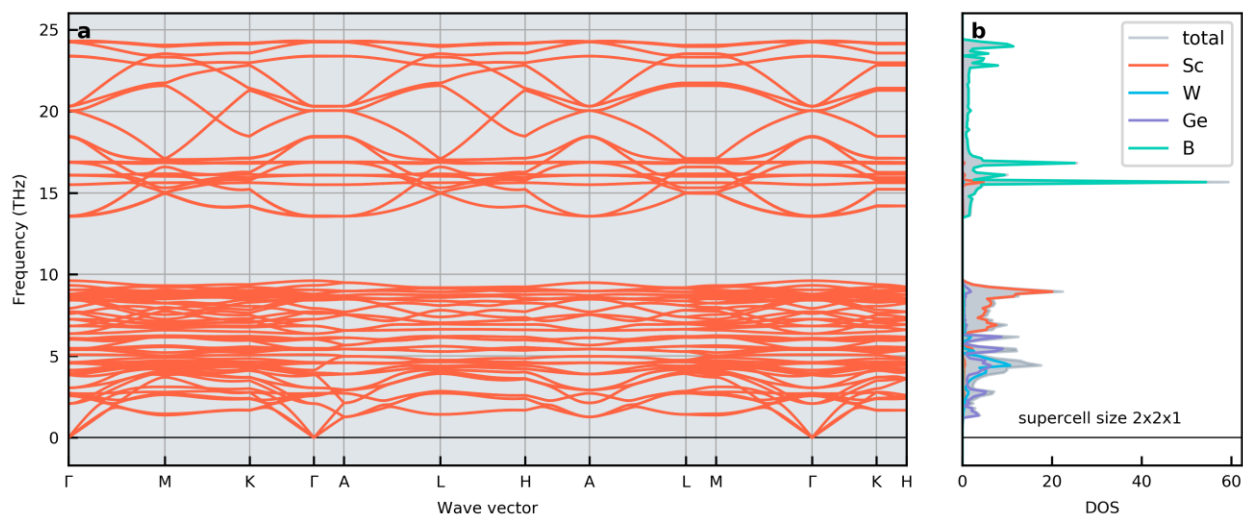

Figure S41. Phonon dispersion and phonon DOS for  $\text{Sc}_{4/3}\text{W}_{2/3}\text{GeB}_2$  with  $P\bar{6}2c$  symmetry.

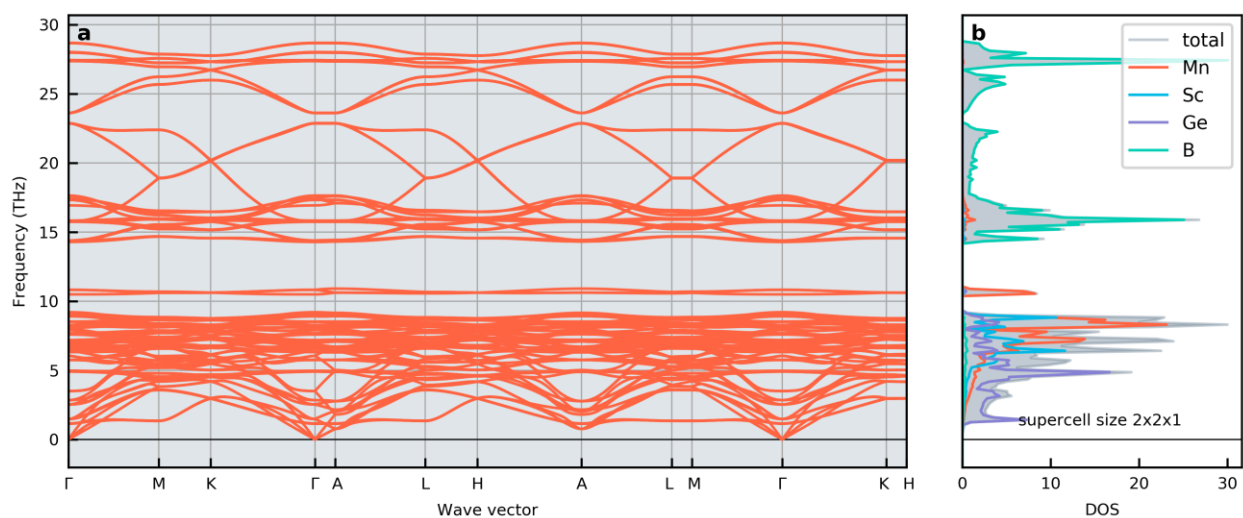

Figure S42. Phonon dispersion and phonon DOS for  $\text{Mn}_{4/3}\text{Sc}_{2/3}\text{GeB}_2$  with  $R\bar{3}m$  symmetry.

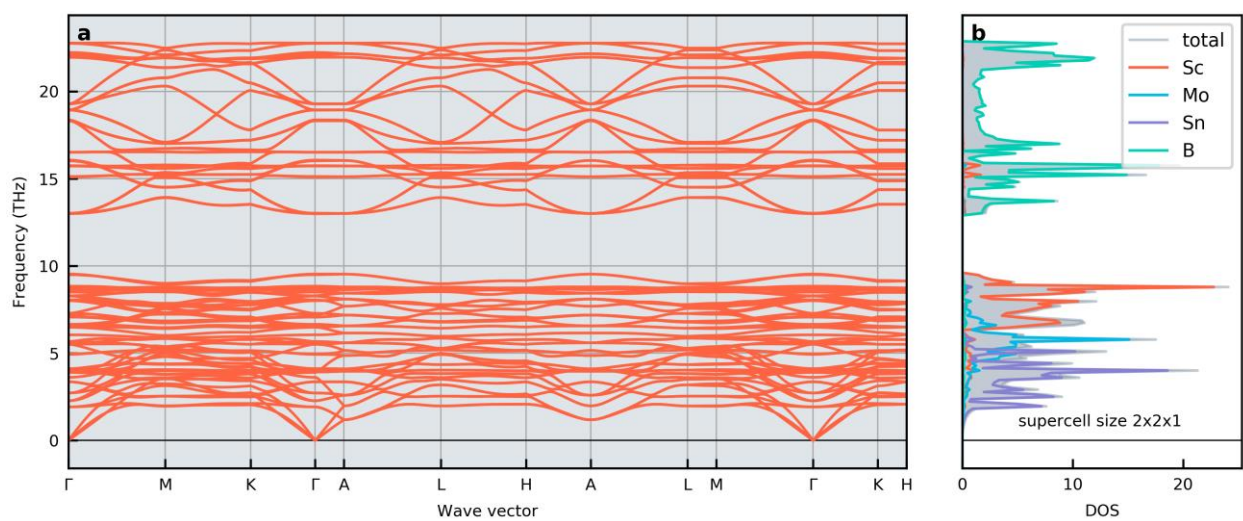

Figure S43. Phonon dispersion and phonon DOS for  $\text{Sc}_{4/3}\text{Mo}_{2/3}\text{SnB}_2$  with  $P\bar{6}2c$  symmetry.

Table S7. Atomic radius and electronegativity considered for  $M$  and  $A$ .<sup>11, 12</sup>

| $M$ | Atomic radius $r_M$ (Å) | Electronegativity $\rho_M$<br>(Pauling scale) | $A$ | Atomic radius $r_A$ (Å) | Electronegativity $\rho_A$<br>(Pauling scale) |
|-----|-------------------------|-----------------------------------------------|-----|-------------------------|-----------------------------------------------|
| Sc  | 1.62                    | 1.36                                          | Al  | 1.43                    | 1.61                                          |
| Y   | 1.80                    | 1.22                                          | Ga  | 1.40                    | 1.81                                          |
| Ti  | 1.47                    | 1.54                                          | In  | 1.58                    | 1.78                                          |
| Zr  | 1.60                    | 1.33                                          | Si  | 1.38                    | 1.90                                          |
| Hf  | 1.59                    | 1.30                                          | Ge  | 1.44                    | 2.01                                          |
| V   | 1.35                    | 1.63                                          | Sn  | 1.63                    | 1.96                                          |
| Nb  | 1.46                    | 1.60                                          |     |                         |                                               |
| Ta  | 1.46                    | 1.50                                          |     |                         |                                               |
| Cr  | 1.29                    | 1.66                                          |     |                         |                                               |
| Mo  | 1.39                    | 2.16                                          |     |                         |                                               |
| W   | 1.39                    | 2.36                                          |     |                         |                                               |
| Mn  | 1.27                    | 1.55                                          |     |                         |                                               |
| Fe  | 1.26                    | 1.83                                          |     |                         |                                               |
| Co  | 1.25                    | 1.88                                          |     |                         |                                               |

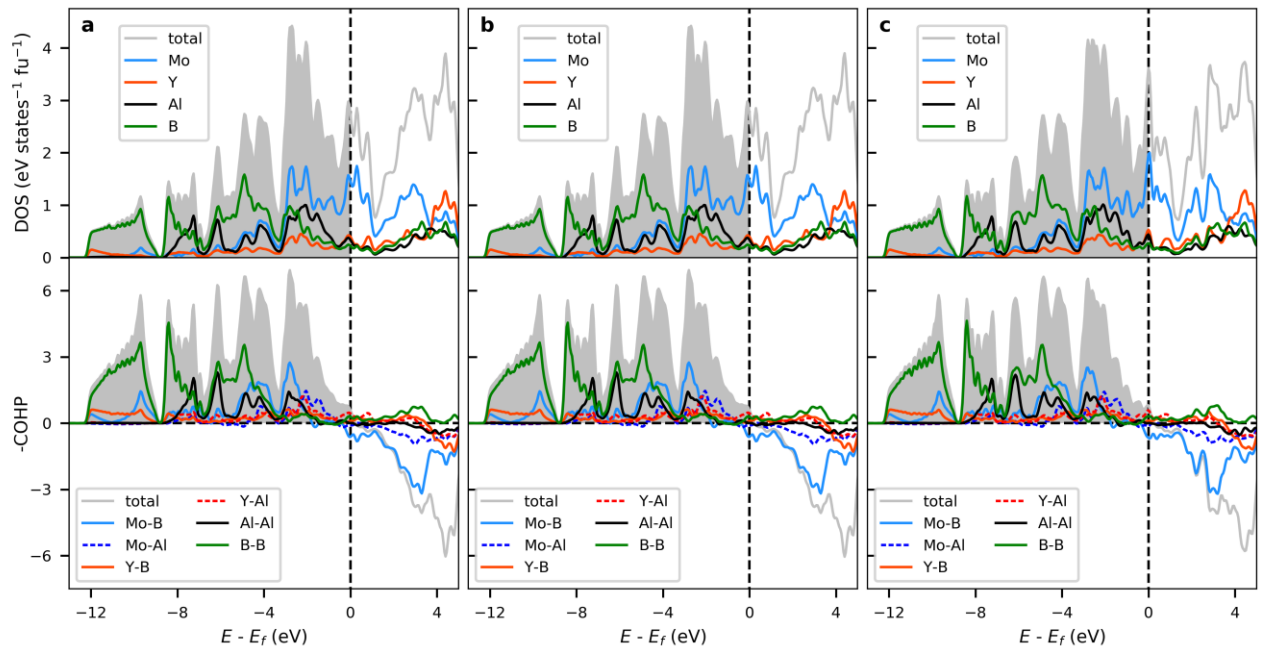

Figure S44. Calculated density of states, DOS, and crystal overlap Hamiltonian population, COHP, for *i*-MAB phase  $\text{Mo}_{4/3}\text{Y}_{2/3}\text{AlB}_2$  in (a)  $C2$ , (b)  $R\bar{3}m$ , and (c)  $P\bar{6}2c$  space group symmetry. The filled regions represent occupied states, and the Fermi level is set to 0 eV.

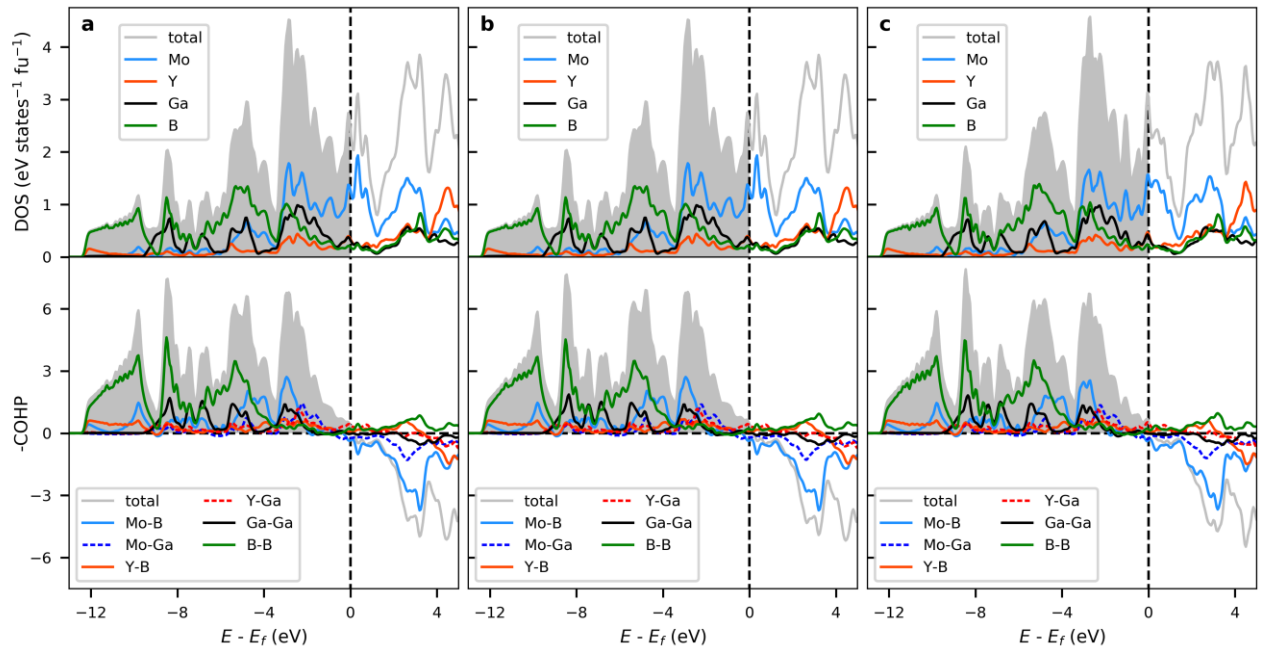

Figure S45. Calculated density of states, DOS, and crystal overlap Hamiltonian population, COHP, for *i*-MAB phase  $\text{Mo}_{4/3}\text{Y}_{2/3}\text{GaB}_2$  in (a)  $C2$ , (b)  $R\bar{3}m$ , and (c)  $P\bar{6}2c$  space group symmetry. The filled regions represent occupied states, and the Fermi level is set to 0 eV.

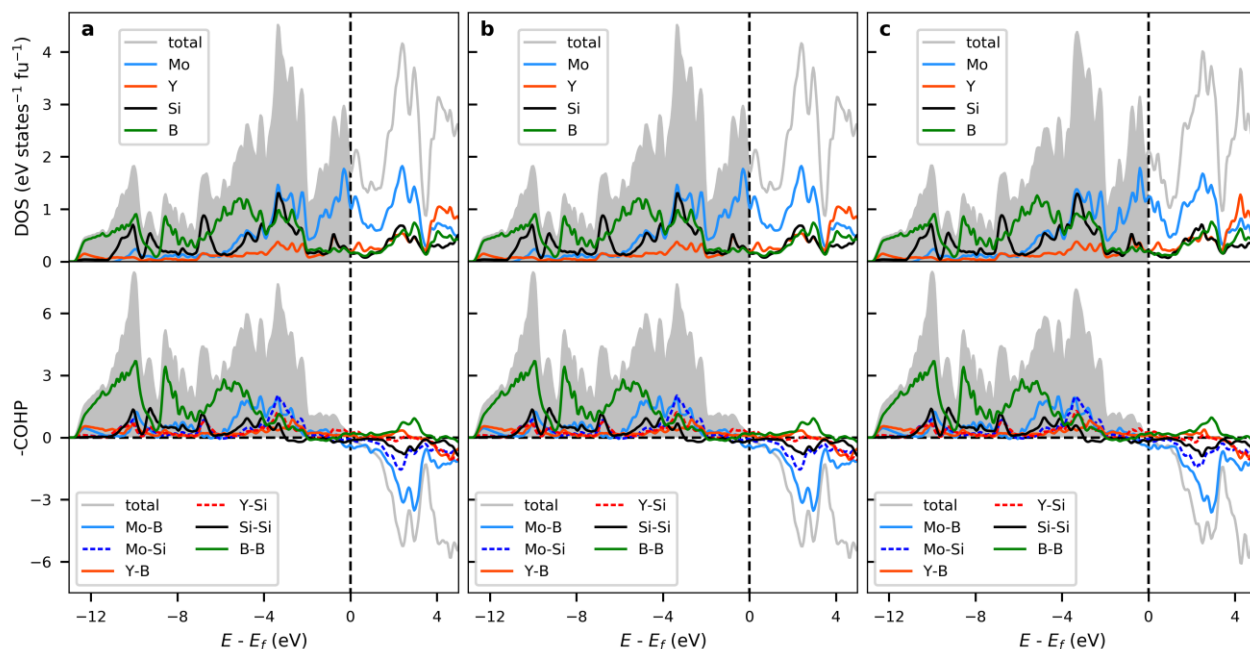

Figure S46. Calculated density of states, DOS, and crystal overlap Hamilton population, COHP, for *i*-MAB phase  $\text{Mo}_{4/3}\text{Y}_{2/3}\text{SiB}_2$  in (a)  $C2$ , (b)  $R\bar{3}m$ , and (c)  $P\bar{6}2c$  space group symmetry. The filled regions represent occupied states, and the Fermi level is set to 0 eV.

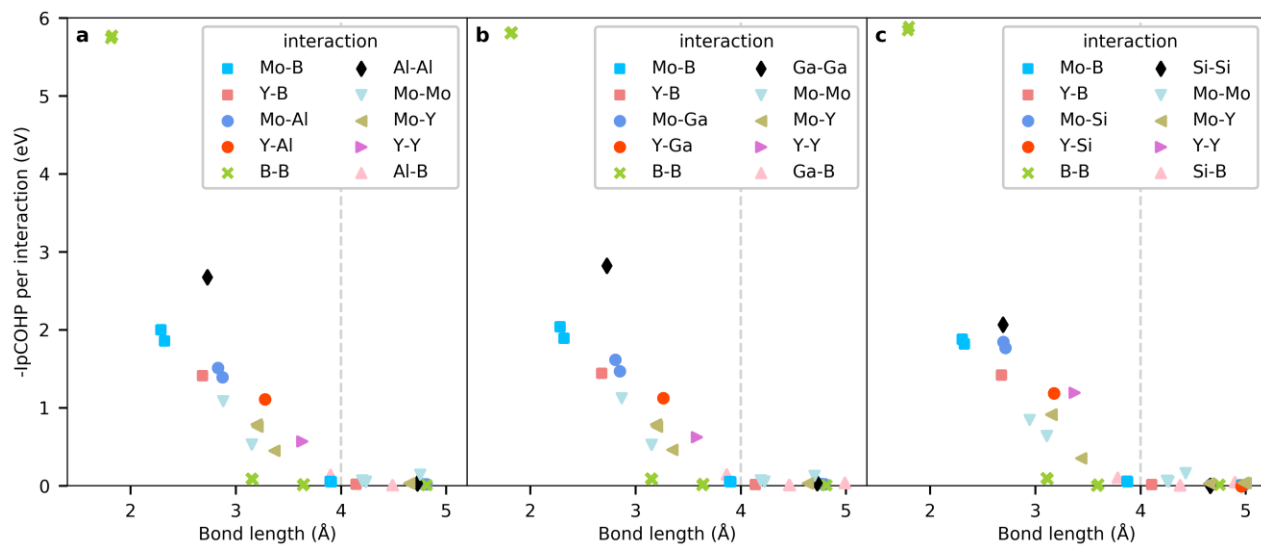

Figure S47. Integrated crystal overlap Hamilton population, IpCOHP, for individual interactions in *i*-MAB phase  $\text{Mo}_{4/3}\text{Y}_{2/3}\text{AB}_2$  with  $R\bar{3}m$  space group symmetry for (a)  $A = \text{Al}$ , (b)  $A = \text{Ga}$ , and (c)  $A = \text{Si}$ . IpCOHP obtained for all interactions up to 5 Å.

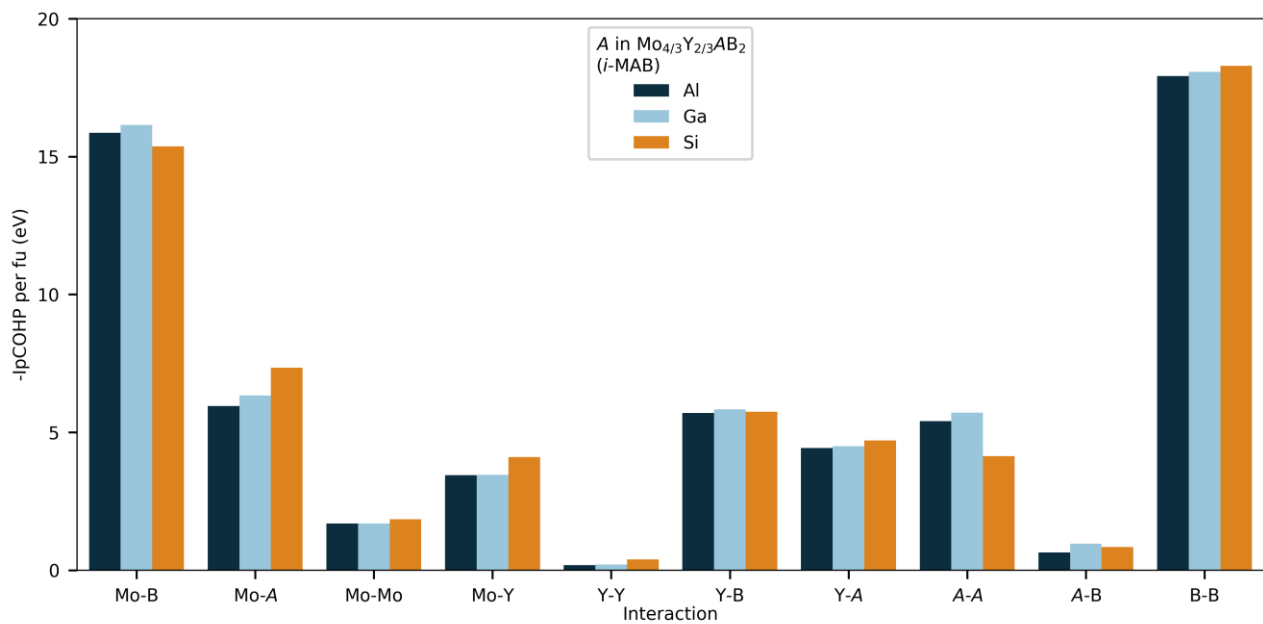

Figure S48. Comparison of bonding strength in selected *i*-MAB phases. Total integrated crystal overlap Hamiltonian population,  $I_p\text{COHP}$ , per formula unit of *i*-MAB phase  $\text{Mo}_{4/3}\text{Y}_{2/3}\text{AB}_2$  with  $R\bar{3}m$  space group symmetry for  $A = \text{Al}, \text{Ga}, \text{Si}$ . Values obtained by summing up each type of interaction up to 5 Å.

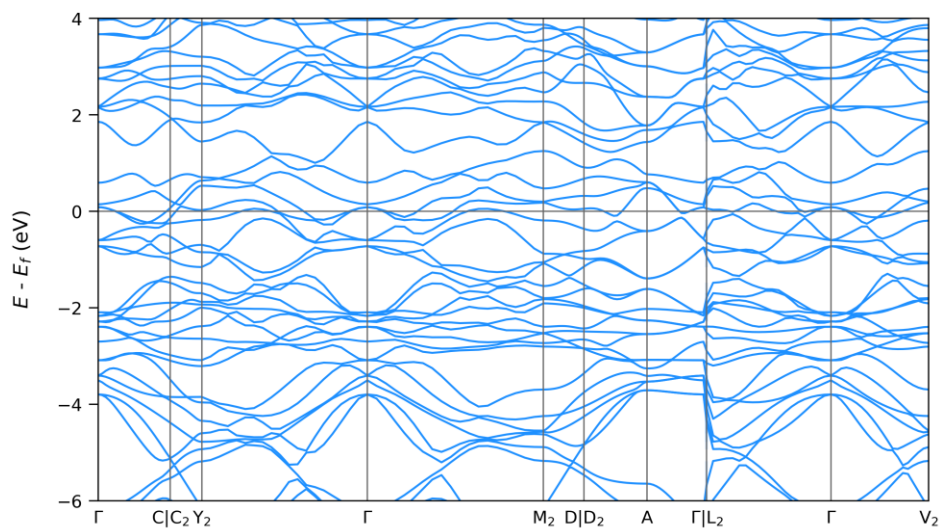

Figure S49. Calculated electronic band structure for  $\text{Mo}_{4/3}\text{Y}_{2/3}\text{AlB}_2$  with  $C2$  space group symmetry.

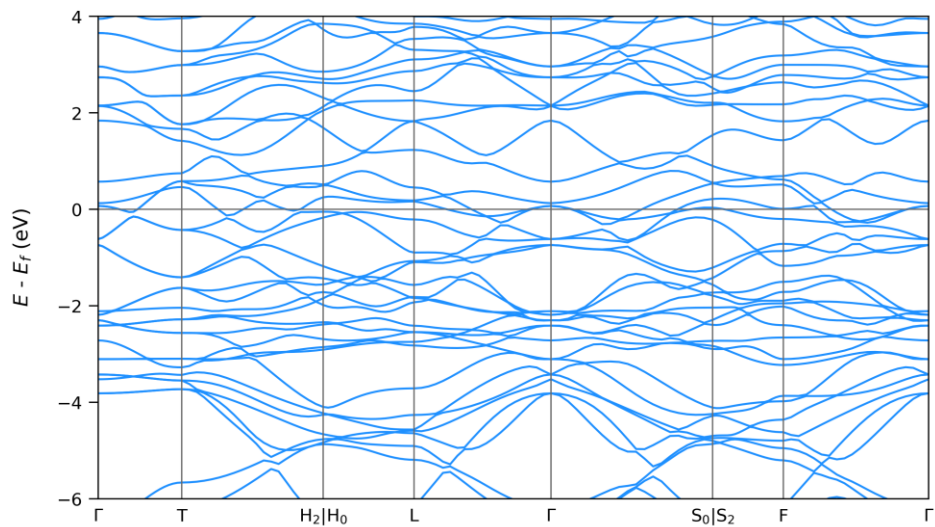

Figure S50. Calculated electronic band structure for  $\text{Mo}_{4/3}\text{Y}_{2/3}\text{AlB}_2$  with  $R\bar{3}m$  space group symmetry.

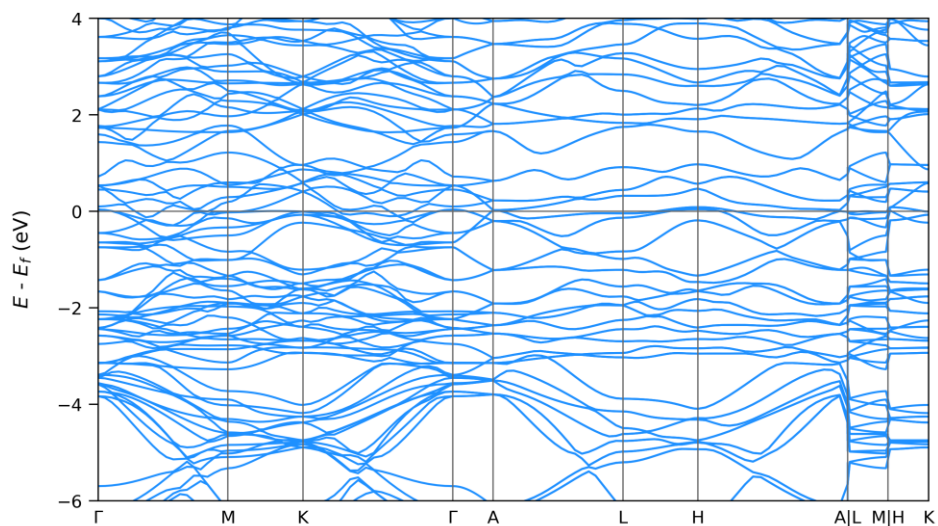

Figure S51. Calculated electronic band structure for  $\text{Mo}_{4/3}\text{Y}_{2/3}\text{AlB}_2$  with  $P\bar{6}2c$  space group symmetry.



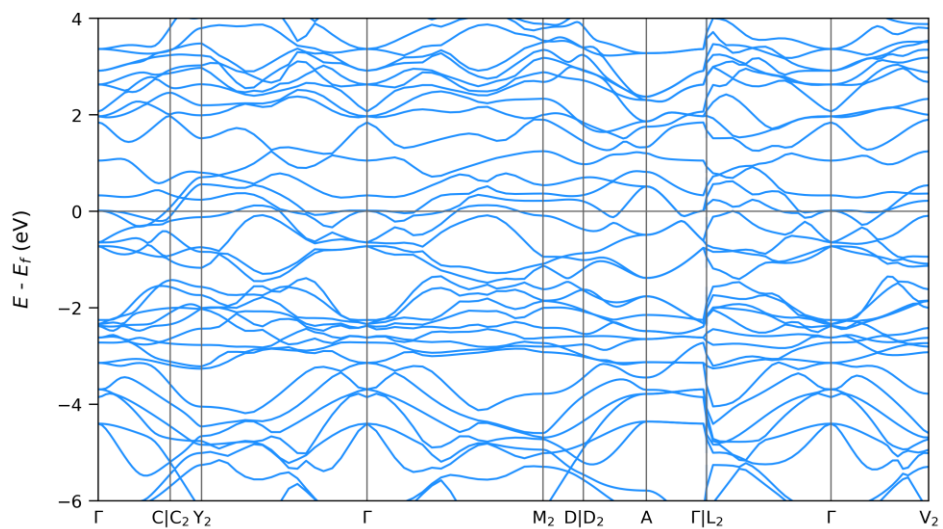

Figure S52. Calculated electronic band structure for  $\text{Mo}_{4/3}\text{Y}_{2/3}\text{GaB}_2$  with  $C2$  space group symmetry.

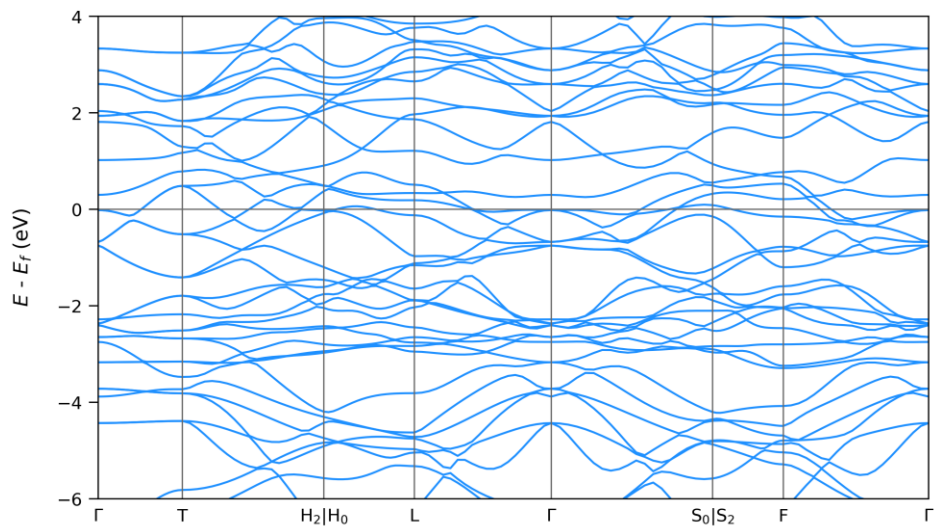

Figure S53. Calculated electronic band structure for  $\text{Mo}_{4/3}\text{Y}_{2/3}\text{GaB}_2$  with  $R\bar{3}m$  space group symmetry.

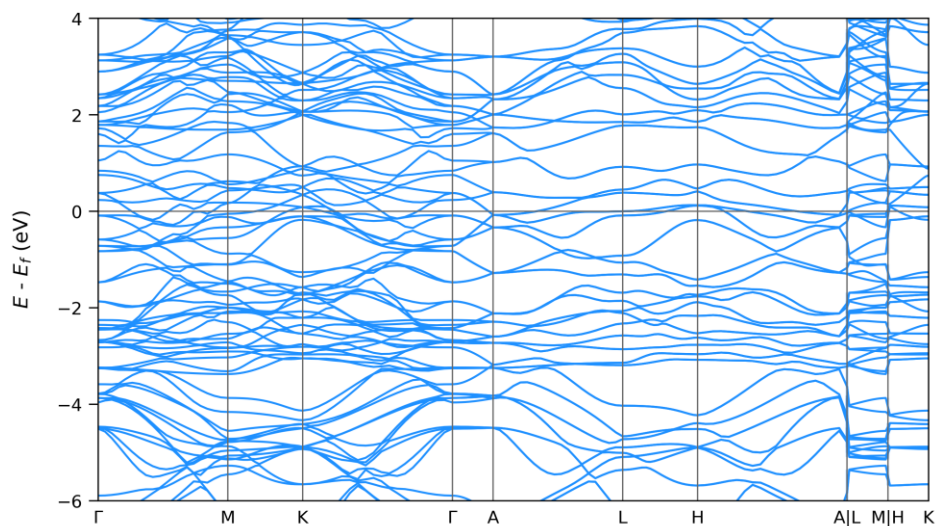

Figure S54. Calculated electronic band structure for  $\text{Mo}_{4/3}\text{Y}_{2/3}\text{GaB}_2$  with  $P\bar{6}2c$  space group symmetry.

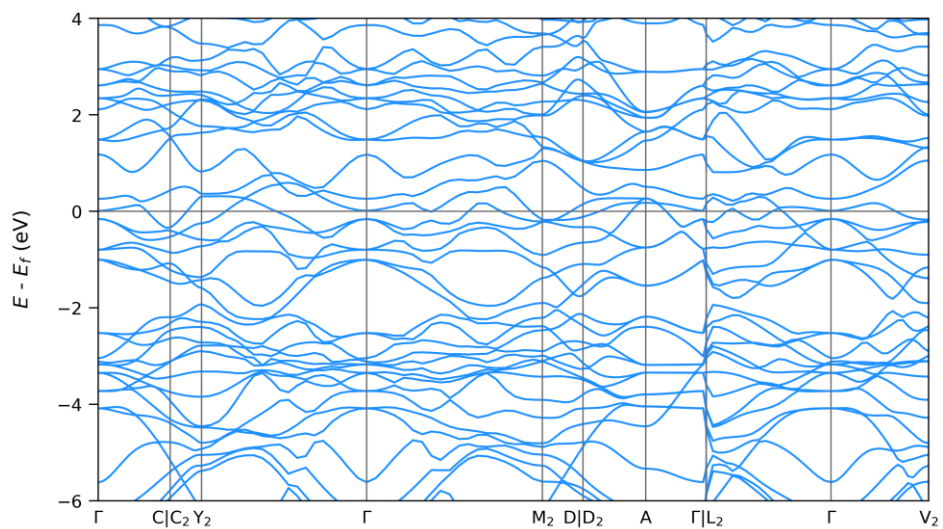

Figure S55. Calculated electronic band structure for  $\text{Mo}_{4/3}\text{Y}_{2/3}\text{SiB}_2$  with  $C_2$  space group symmetry.

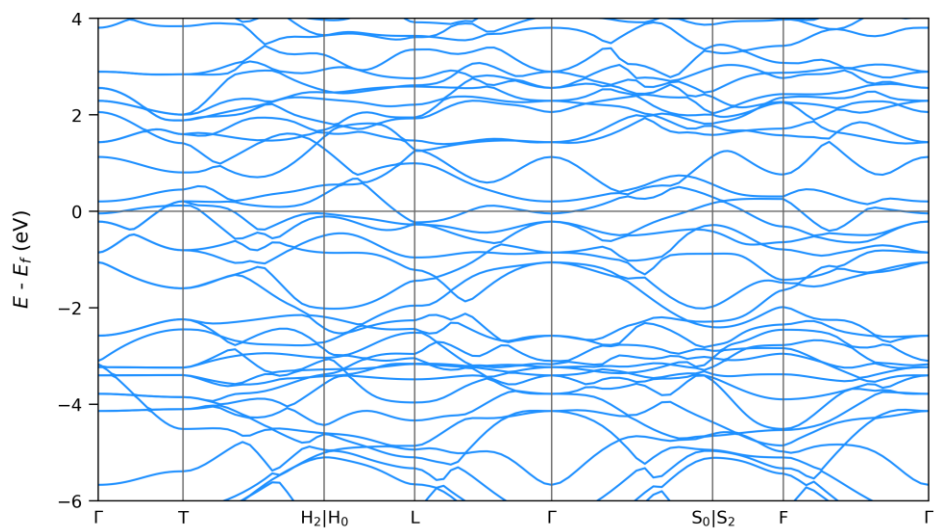

Figure S56. Calculated electronic band structure for  $\text{Mo}_{4/3}\text{Y}_{2/3}\text{SiB}_2$  with  $R\bar{3}m$  space group symmetry.

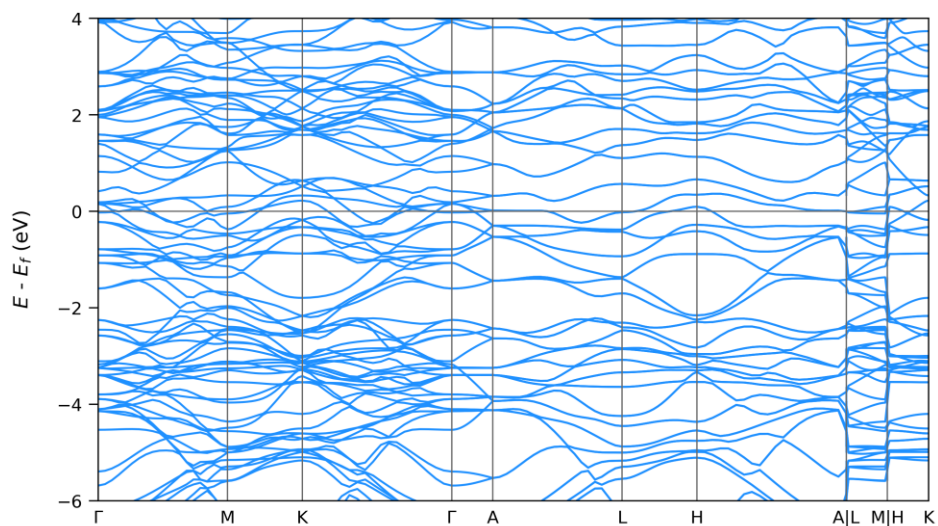

Figure S57. Calculated electronic band structure for  $\text{Mo}_{4/3}\text{Y}_{2/3}\text{SiB}_2$  with  $P\bar{6}2c$  space group symmetry.



The elastic constants are retrieved using the stress-strain relationship.

$$\boldsymbol{\sigma} = \mathbf{C}\boldsymbol{\varepsilon} \quad (\text{Eq. S1})$$

Here  $\boldsymbol{\sigma}$  is the stress tensor as obtained from computational output. The strain tensor  $\boldsymbol{\varepsilon}$  is applied to transform the shape of the atomic structure. Finally,  $\mathbf{C}$  is the elastic constant tensor.

$$\boldsymbol{\sigma} = \begin{pmatrix} \sigma_1 \\ \sigma_2 \\ \sigma_3 \\ \sigma_4 \\ \sigma_5 \\ \sigma_6 \end{pmatrix} \quad \boldsymbol{\varepsilon} = \begin{pmatrix} \varepsilon_1 \\ \varepsilon_2 \\ \varepsilon_3 \\ \varepsilon_4 \\ \varepsilon_5 \\ \varepsilon_6 \end{pmatrix} \quad \mathbf{C} = \begin{pmatrix} c_{11} & c_{12} & c_{13} & c_{14} & c_{15} & c_{16} \\ c_{12} & c_{22} & c_{23} & c_{24} & c_{25} & c_{26} \\ c_{13} & c_{23} & c_{33} & c_{34} & c_{35} & c_{36} \\ c_{14} & c_{24} & c_{34} & c_{44} & c_{45} & c_{46} \\ c_{15} & c_{25} & c_{35} & c_{45} & c_{55} & c_{56} \\ c_{16} & c_{26} & c_{36} & c_{46} & c_{56} & c_{66} \end{pmatrix} \quad (\text{Eq. S2})$$

The elastic compliances  $\mathbf{S}$  are the inverse of the elastic constants  $\mathbf{C}$ .

$$\mathbf{S} = \begin{pmatrix} s_{11} & s_{12} & s_{13} & s_{14} & s_{15} & s_{16} \\ s_{12} & s_{22} & s_{23} & s_{24} & s_{25} & s_{26} \\ s_{13} & s_{23} & s_{33} & s_{34} & s_{35} & s_{36} \\ s_{14} & s_{24} & s_{34} & s_{44} & s_{45} & s_{46} \\ s_{15} & s_{25} & s_{35} & s_{45} & s_{55} & s_{56} \\ s_{16} & s_{26} & s_{36} & s_{46} & s_{56} & s_{66} \end{pmatrix}; \quad \sum_{\gamma} c_{\alpha\gamma} s_{\gamma\beta} = \delta_{\alpha\beta}; \quad \mathbf{CS} = \mathbf{1} \quad (\text{Eq. S3})$$

In order to use the strain tensor to transform the basis, it is described in the form of a three-dimensional matrix.

$$\boldsymbol{\varepsilon} = \begin{pmatrix} \varepsilon_1 & \varepsilon_6/2 & \varepsilon_5/2 \\ \varepsilon_6/2 & \varepsilon_2 & \varepsilon_4/2 \\ \varepsilon_5/2 & \varepsilon_4/2 & \varepsilon_3 \end{pmatrix} \quad (\text{Eq. S4})$$

In this form, any vector  $\mathbf{r} = (x, y, z)$  is transformed to  $\mathbf{r}' = (x', y', z')$  in the following way.

$$\begin{pmatrix} x' \\ y' \\ z' \end{pmatrix} = (\boldsymbol{\varepsilon} + \mathbf{J}) \begin{pmatrix} x \\ y \\ z \end{pmatrix} = \begin{pmatrix} 1 + \varepsilon_1 & \varepsilon_6/2 & \varepsilon_5/2 \\ \varepsilon_6/2 & 1 + \varepsilon_2 & \varepsilon_4/2 \\ \varepsilon_5/2 & \varepsilon_4/2 & 1 + \varepsilon_3 \end{pmatrix} \begin{pmatrix} x \\ y \\ z \end{pmatrix} = \begin{pmatrix} (1 + \varepsilon_1)x + \varepsilon_6y/2 + \varepsilon_5z/2 \\ \varepsilon_6x/2 + (1 + \varepsilon_2)y + \varepsilon_4z/2 \\ \varepsilon_5x/2 + \varepsilon_4y/2 + (1 + \varepsilon_3)z \end{pmatrix} \quad (\text{Eq. S5})$$

However, as our *i*-MAB phases of space groups  $P\bar{6}2m$ ,  $P\bar{6}2c$  and  $R32$  have hexagonal symmetry there are only 6 unique elastic constants.

$$\mathbf{C} = \begin{pmatrix} c_{11} & c_{12} & c_{13} & 0 & 0 & 0 \\ c_{12} & c_{11} & c_{13} & 0 & 0 & 0 \\ c_{13} & c_{13} & c_{33} & 0 & 0 & 0 \\ 0 & 0 & 0 & c_{44} & 0 & 0 \\ 0 & 0 & 0 & 0 & c_{44} & 0 \\ 0 & 0 & 0 & 0 & 0 & c_{66} \end{pmatrix} \quad (\text{Eq. S6})$$

In order to obtain these values, we apply the following three strain tensors which we calculate for multiple values of  $\delta$ . We then approximate the elastic constants from the slope of the stress-strain relations listed below.

$$\boldsymbol{\varepsilon}^1 = \begin{pmatrix} \delta \\ \delta \\ 0 \\ 0 \\ 0 \\ 0 \end{pmatrix} \quad \boldsymbol{\varepsilon}^2 = \begin{pmatrix} \delta \\ -\delta \\ 0 \\ 0 \\ 0 \\ 0 \end{pmatrix} \quad \boldsymbol{\varepsilon}^3 = \begin{pmatrix} 0 \\ 0 \\ \delta \\ \delta \\ \delta \\ \delta \end{pmatrix} \quad (\text{Eq. S7})$$

From tensor  $\boldsymbol{\varepsilon}^1$ :

$$\begin{aligned} \sigma_1 &= (c_{11} + c_{12})\delta \\ \sigma_2 &= (c_{12} + c_{22})\delta \\ \sigma_3 &= (c_{13} + c_{23})\delta \end{aligned} \quad (\text{Eq. S8})$$

From tensor  $\boldsymbol{\varepsilon}^2$ :

$$\begin{aligned} \sigma_1 &= (c_{11} - c_{12})\delta \\ \sigma_2 &= (c_{12} - c_{22})\delta \\ \sigma_3 &= (c_{13} - c_{23})\delta \end{aligned} \quad (\text{Eq. S9})$$

From tensor  $\boldsymbol{\varepsilon}^3$ :

$$\begin{aligned} \sigma_1 &= c_{13}\delta \\ \sigma_2 &= c_{23}\delta \\ \sigma_3 &= c_{33}\delta \\ \sigma_4 &= c_{44}\delta \\ \sigma_5 &= c_{55}\delta \\ \sigma_6 &= c_{66}\delta \end{aligned} \quad (\text{Eq. S10})$$

The elastic constants  $c_{ij}$  apply to homogenous, monocrystalline structures, but based on these, the polycrystalline elastic constants  $B$ ,  $G$ ,  $E$  and  $\nu$  for a bulk material made up of multiple grains may be calculated as follows, ref [22] in the main article.

In general form the bulk modulus  $B$  and shear modulus  $G$  are calculated according to Voigt ( $B_V$  and  $G_V$ ) and Reuss ( $B_R$  and  $G_R$ ).

$$B_V = \frac{(c_{11} + c_{22} + c_{33}) + 2(c_{12} + c_{13} + c_{23})}{9} \quad (\text{Eq. S11})$$

$$G_V = \frac{(c_{11} + c_{22} + c_{33}) - (c_{12} + c_{13} + c_{23}) + 3(c_{44} + c_{55} + c_{66})}{15} \quad (\text{Eq. S12})$$

$$B_R = \frac{1}{(s_{11} + s_{22} + s_{33}) + 2(s_{12} + s_{13} + s_{23})} \quad (\text{Eq. S13})$$

$$G_R = \frac{1}{4(s_{11} + s_{22} + s_{33}) - 4(s_{12} + s_{13} + s_{23}) + 3(s_{44} + s_{55} + s_{66})} \quad (\text{Eq. S14})$$

Throughout both the main text of the article, as well as this supplemental, bulk and shear modulus are provided as the Hill averages  $B_H$  and  $G_H$ .

$$B_H = \frac{B_V + B_R}{2} \quad (\text{Eq. S15})$$

$$G_H = \frac{G_V + G_R}{2} \quad (\text{Eq. S16})$$

Young's modulus  $E$ , or the elastic constant, is derived from bulk and shear modulus according to:

$$E = \frac{9BG}{3B + G} \quad (\text{Eq. S17})$$

and the Poisson ratio is defined as

$$\nu = \frac{3B - 2G}{2(3B + G)} \quad (\text{Eq. S18})$$

Using the methods above, moduli and Poisson ratio were calculated for selected low-energy symmetries of  $\text{Mo}_{4/3}\text{Y}_{2/3}\text{AB}_2$  *i*-MAB phases motivated by their being predicted stable. They are provided in Table S8 and Figure S58. For a given *i*-MAB composition there are no qualitative differences between different space group symmetries.

Table S8. Calculated moduli and Poisson ratio for  $\text{Mo}_{4/3}\text{Y}_{2/3}\text{AB}_2$  with  $C2$ ,  $R\bar{3}m$ , and  $P\bar{6}2c$  space group symmetry and  $A = \text{Al, Si, Ga}$ .

| <i>i</i> -MAB Phase                         | space group        | Moduli (GPa) |       |       |       |       |       |       |       |       | Poisson ratio |         |         |
|---------------------------------------------|--------------------|--------------|-------|-------|-------|-------|-------|-------|-------|-------|---------------|---------|---------|
|                                             |                    | $B_V$        | $B_R$ | $B_H$ | $E_V$ | $E_R$ | $E_H$ | $G_V$ | $G_R$ | $G_H$ | $\nu_V$       | $\nu_R$ | $\nu_H$ |
| $\text{Mo}_{4/3}\text{Y}_{2/3}\text{AlB}_2$ | $C2$ (5)           | 172          | 171   | 171   | 289   | 285   | 287   | 119   | 117   | 118   | 0.219         | 0.222   | 0.220   |
|                                             | $R\bar{3}m$ (166)  | 172          | 171   | 171   | 291   | 286   | 288   | 119   | 117   | 118   | 0.218         | 0.221   | 0.220   |
|                                             | $P\bar{6}2c$ (190) | 172          | 171   | 171   | 285   | 280   | 282   | 116   | 114   | 115   | 0.223         | 0.228   | 0.226   |
| $\text{Mo}_{4/3}\text{Y}_{2/3}\text{SiB}_2$ | $C2$ (5)           | 197          | 196   | 196   | 291   | 274   | 283   | 116   | 108   | 112   | 0.253         | 0.267   | 0.260   |
|                                             | $R\bar{3}m$ (166)  | 197          | 196   | 197   | 291   | 275   | 283   | 116   | 109   | 112   | 0.253         | 0.267   | 0.260   |
|                                             | $P\bar{6}2c$ (190) | 196          | 196   | 196   | 287   | 270   | 279   | 114   | 106   | 110   | 0.256         | 0.270   | 0.263   |
| $\text{Mo}_{4/3}\text{Y}_{2/3}\text{GaB}_2$ | $C2$ (5)           | 172          | 171   | 172   | 278   | 272   | 275   | 113   | 110   | 112   | 0.231         | 0.235   | 0.233   |
|                                             | $R\bar{3}m$ (166)  | 171          | 171   | 171   | 276   | 271   | 273   | 112   | 109   | 111   | 0.231         | 0.236   | 0.234   |
|                                             | $P\bar{6}2c$ (190) | 172          | 171   | 171   | 273   | 267   | 270   | 111   | 108   | 109   | 0.235         | 0.240   | 0.237   |

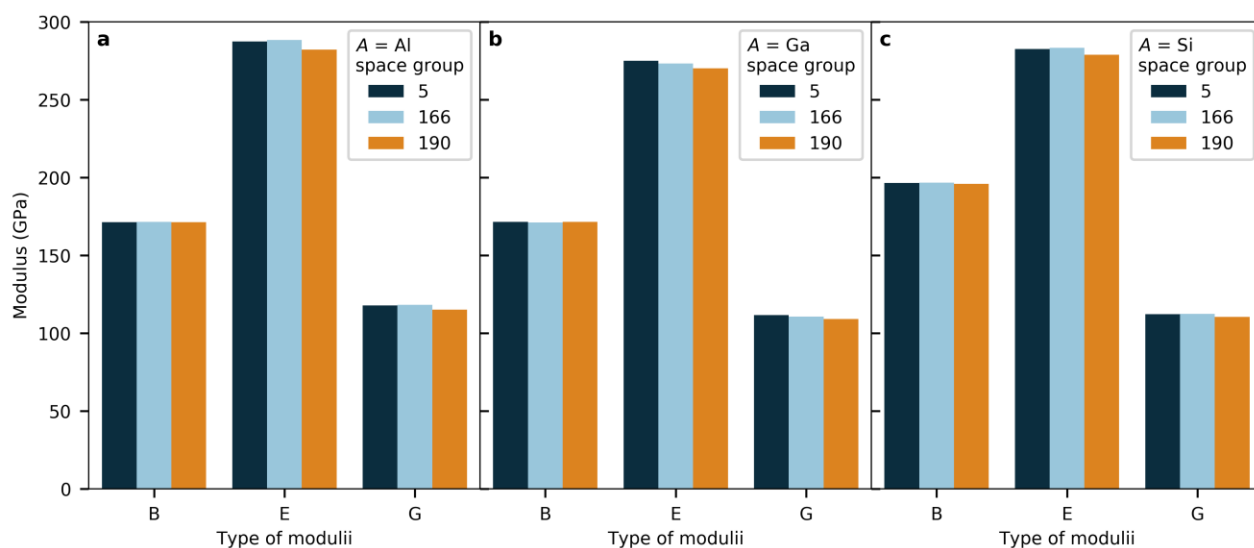

Figure S58. Bulk modulus,  $B$ , Young modulus  $E$ , and Shear modulus  $G$  for  $\text{Mo}_{4/3}\text{Y}_{2/3}\text{AB}_2$  with  $C2$ ,  $R\bar{3}m$ , and  $P\bar{6}2c$  space group symmetry for (a)  $A = \text{Al}$ , (b)  $A = \text{Ga}$ , and (c)  $A = \text{Si}$ .

## REFERENCES

1. Chaban, N. F.; Kuz'Ma, I. U. B., Ternary systems Cr-Al-B and Mn-Al-B. *Akad. Nauk SSSR Izv. Neorg. Mater.* **1973**, *9*, 1908-1911.
2. Ade, M.; Hillebrecht, H., Ternary Borides Cr<sub>2</sub>AlB<sub>2</sub>, Cr<sub>3</sub>AlB<sub>4</sub>, and Cr<sub>4</sub>AlB<sub>6</sub>: The First Members of the Series (CrB<sub>2</sub>)<sub>n</sub>CrAl with  $n = 1, 2, 3$  and a Unifying Concept for Ternary Borides as MAB-Phases. *Inorg. Chem.* **2015**, *54* (13), 6122-6135.
3. Chai, P.; Stoian, S. A.; Tan, X.; Dube, P. A.; Shatruk, M., Investigation of magnetic properties and electronic structure of layered-structure borides AlT<sub>2</sub>B<sub>2</sub> (T=Fe, Mn, Cr) and AlFe<sub>2-x</sub>Mn<sub>x</sub>B<sub>2</sub>. *J. Solid State Chem.* **2015**, *224*, 52-61.
4. Becher, H. J.; Krogmann, K.; Peisker, E., Über das ternäre Borid Mn<sub>2</sub>AlB<sub>2</sub>. *Zeitschrift für anorganische und allgemeine Chemie* **1966**, *344* (3-4), 140-147.
5. Potashnikov, D.; Caspi, E. N.; Pesach, A.; Hoser, A.; Kota, S.; Verger, L.; Barsoum, M. W.; Felner, I.; Keren, A.; Rivin, O., Magnetic ordering in the nano-laminar ternary Mn<sub>2</sub>AlB<sub>2</sub> using neutron and X-ray diffraction. *J. Magn. Magn. Mater.* **2019**, *471*, 468-474.
6. Jeitschko, W., The crystal structure of Fe<sub>2</sub>AlB<sub>2</sub>. *Acta Crystallographica* **1969**, *B25*, 163.
7. Tan, X.; Chai, P.; Thompson, C. M.; Shatruk, M., Magnetocaloric Effect in AlFe<sub>2</sub>B<sub>2</sub>: Toward Magnetic Refrigerants from Earth-Abundant Elements. *J. Am. Chem. Soc.* **2013**, *135* (25), 9553-9557.
8. Wang, J.; Ye, T.-N.; Gong, Y.; Wu, J.; Miao, N.; Tada, T.; Hosono, H., Discovery of hexagonal ternary phase Ti<sub>2</sub>InB<sub>2</sub> and its evolution to layered boride TiB. *Nat. Commun.* **2019**, *10* (1), 2284.
9. Hanner, L. A.; Badr, H. O.; Dahlqvist, M.; Kota, S.; Rosen, J.; Barsoum, M. W., Synthesis, Characterization and First Principle Modeling of the MAB Phase Solid Solutions: (Mn<sub>1-x</sub>Cr<sub>x</sub>)<sub>2</sub>AlB<sub>2</sub> and (Mn<sub>1-x</sub>Cr<sub>x</sub>)<sub>3</sub>AlB<sub>4</sub>. *Mater. Res. Lett.* **2021**, *9* (2), 112-118.
10. Dahlqvist, M.; Tao, Q.; Zhou, J.; Palisaitis, J.; Persson, P. O. Å.; Rosen, J., Theoretical Prediction and Synthesis of a Family of Atomic Laminate Metal Borides with In-Plane Chemical Ordering. *J. Am. Chem. Soc.* **2020**, *142* (43), 18583-18591.
11. Greenwood, N. N.; Earnshaw, A., *Chemistry of the Elements*. 2nd ed.; Butterworth-Heinemann: 1997.
12. Huheey, J. E.; Keiter, E. A.; Keiter, R. L., *Inorganic Chemistry : Principles of Structure and Reactivity*. 4th ed.; HarperCollins: New York, USA, 1993.
